1 **Host specific sensing of coronaviruses and picornaviruses by the CARD8 inflammasome**

2

3 **Authors**

4 Brian V. Tsu<sup>1</sup>, Rimjhim Agarwal<sup>1</sup>, Nandan S. Gokhale<sup>3</sup>, Jessie Kulsuptrakul<sup>4</sup>, Andrew P. Ryan<sup>1</sup>,  
5 Lennice K. Castro<sup>1</sup>, Christopher M. Beierschmitt<sup>1</sup>, Elizabeth A. Turcotte<sup>5</sup>, Elizabeth J. Fay<sup>1</sup>,  
6 Russell E. Vance<sup>5,6</sup>, Jennifer L. Hyde<sup>2</sup>, Ram Savan<sup>3</sup>, Patrick S. Mitchell<sup>2\*</sup>, Matthew D.  
7 Daugherty<sup>1\*</sup>

8

9 **Affiliations:**

10 <sup>1</sup>Department of Molecular Biology, University of California, San Diego; La Jolla, CA, USA.

11 <sup>2</sup>Department of Microbiology, University of Washington; Seattle, WA, USA.

12 <sup>3</sup>Department of Immunology, University of Washington; Seattle, WA, USA.

13 <sup>4</sup>Molecular and Cellular Biology Graduate Program, University of Washington; Seattle, WA,  
14 USA.

15 <sup>5</sup>Division of Immunology and Pathogenesis, University of California, Berkeley; Berkeley, CA,  
16 USA.

17 <sup>6</sup>Howard Hughes Medical Institute, University of California, Berkeley; Berkeley, CA, USA.

18

19 \*Corresponding authors. Matthew D. Daugherty ([mddaugherty@ucsd.edu](mailto:mddaugherty@ucsd.edu)) and Patrick S.  
20 Mitchell ([psmitche@uw.edu](mailto:psmitche@uw.edu))

21

22 **Short title: Coronavirus and picornavirus proteases activate the CARD8 inflammasome**

23

24 **Keywords: Host-virus evolution, CARD8, inflammasome, effector-triggered immunity,**  
25 **viral proteases, coronaviruses, picornaviruses, SARS-CoV-2, COVID-19**

26

27 **Abstract**

28 Hosts have evolved diverse strategies to respond to microbial infections, including the detection  
29 of pathogen-encoded proteases by inflammasome-forming sensors such as NLRP1 and CARD8.  
30 Here, we find that the 3CL protease (3CL<sup>pro</sup>) encoded by diverse coronaviruses, including  
31 SARS-CoV-2, cleaves a rapidly evolving region of human CARD8 and activates a robust  
32 inflammasome response. CARD8 is required for cell death and the release of pro-inflammatory  
33 cytokines during SARS-CoV-2 infection. We further find that natural variation alters CARD8  
34 sensing of 3CL<sup>pro</sup>, including 3CL<sup>pro</sup>-mediated antagonism rather than activation of megabat  
35 CARD8. Likewise, we find that a single nucleotide polymorphism (SNP) in humans reduces  
36 CARD8's ability to sense coronavirus 3CL<sup>pro</sup>s, and instead enables sensing of 3C proteases  
37 (3C<sup>pro</sup>) from select picornaviruses. Our findings demonstrate that CARD8 is a broad sensor of  
38 viral protease activities and suggests that CARD8 diversity contributes to inter- and intra-species  
39 variation in inflammasome-mediated viral sensing and immunopathology.

## 40 **Introduction**

41 Effector-triggered immunity (ETI) is a host defense strategy by which innate immune sensors  
42 recognize pathogens via the detection of pathogen-specific activities (1-5). A subset of  
43 eukaryotic ETI sensors form inflammasomes—large, intracellular immune complexes that  
44 activates a pro-inflammatory caspase, predominantly caspase-1 (CASP1), to initiate  
45 inflammatory signaling via interleukin (IL)-1 $\beta$  and IL-18 and pyroptotic cell death through  
46 cleavage of the pore-forming protein Gasdermin D (GSDMD) (6-8). In humans, the activity of  
47 viral proteases can be sensed by the inflammasome-forming sensors CARD8 and NLRP1 (9-12).  
48 CARD8 is comprised of a disordered N-terminal region and a C-terminal function-to-fund  
49 domain (FIIND) and caspase activation and recruitment domain (CARD). The FIIND undergoes  
50 self-cleavage resulting in a bipartite sensor, with the disordered N-terminus acting as a ‘tripwire’  
51 for viral proteases. For instance, proteolytic cleavage of CARD8 by the HIV-1 protease (HIV-  
52 1<sup>pro</sup>) leads to proteasome-dependent ‘functional degradation’ (13, 14) of the cleaved N-terminus  
53 and release of the bioactive CARD-containing C-terminus, which is sufficient for inflammasome  
54 assembly and activation (12). However, the extent to which CARD8 has evolved to sense other  
55 viral proteases and functions as an innate immune sensor of viral infection has been unclear.

56

### 57 **The SARS-CoV-2 3CL<sup>pro</sup> activates the human CARD8 inflammasome via proteolysis** 58 **within the disordered N-terminus**

59 To determine if the CARD8 inflammasome can sense coronavirus infection by mimicking sites  
60 of viral polyprotein cleavage, we expanded our previous bioinformatic approach (11) to generate  
61 a predictive model for the *Coronaviridae* main protease (3CL<sup>pro</sup>, also known as nsp5 or M  
62 protease), which has been shown to cleave host proteins in addition to the coronavirus

63 polyprotein (15-19). The resulting 3CL<sup>pro</sup> cleavage motif, XXΦQ[G/A/S]XXX (where Φ denotes  
64 a hydrophobic residue and X denotes any amino acid) (**Fig 1A, S1 Fig, S1 and S2 Tables**) is  
65 broadly consistent with previous studies (20-23), and allowed us to predict two putative 3CL<sup>pro</sup>  
66 cleavage sites within the N-terminus of human CARD8 (**Fig 1A**).

67

68 To determine if human CARD8 is cleaved by coronavirus 3CL<sup>pro</sup>, we co-expressed an N-  
69 terminal 3xFlag/mCherry-tagged isoform of human CARD8 (wild-type (WT)) with 3CL<sup>pro</sup> from  
70 SARS-CoV-2 in HEK293T cells (**Fig 1B and S2 Fig**). We used HIV-1<sup>pro</sup> as a positive control  
71 since it had previously been shown to cleave CARD8 between residues F59-F60 (site F59 in **Fig**  
72 **1, A and B**). We observed a ~34kDa CARD8 product in the presence of SARS-CoV-2 3CL<sup>pro</sup>  
73 but not the catalytically inactive C145A 3CL<sup>pro</sup> mutant. The ~34kDa product is predicted to  
74 result from cleavage at site Q37 (**Fig 1A**), which migrated slightly below the cleavage product of  
75 HIV-1<sup>pro</sup>. Mutating the putative P1 residue in the Q37 site (CARD8 Q37A) eliminated the 34kDa  
76 product, confirming SARS-CoV-2 3CL<sup>pro</sup> cleavage at this site. The CARD8 Q37A mutant also  
77 revealed a cryptic ~37kDa 3CL<sup>pro</sup>-dependent product, which matches cleavage at the predicted  
78 site Q61 (**Fig 1A and S2 Fig**). The CARD8 Q37A Q61A mutant was completely insensitive to  
79 cleavage by SARS-CoV-2 3CL<sup>pro</sup> (**Fig 1B**), whereas cleavage by the HIV-1<sup>pro</sup> was unperturbed  
80 by either mutant. Thus, CARD8 can be cleaved by SARS-CoV-2 3CL<sup>pro</sup> at amino acid sequences  
81 that mimic the coronavirus polyprotein cleavage site.

82

83 For both NLRP1 and CARD8, N-terminal proteolytic cleavage can activate CASP1 in a  
84 reconstituted inflammasome assay (10-12, 14, 24). Consistent with the prior observation that  
85 CARD8 is endogenously expressed in some HEK293T cell lines (12), transfection of our



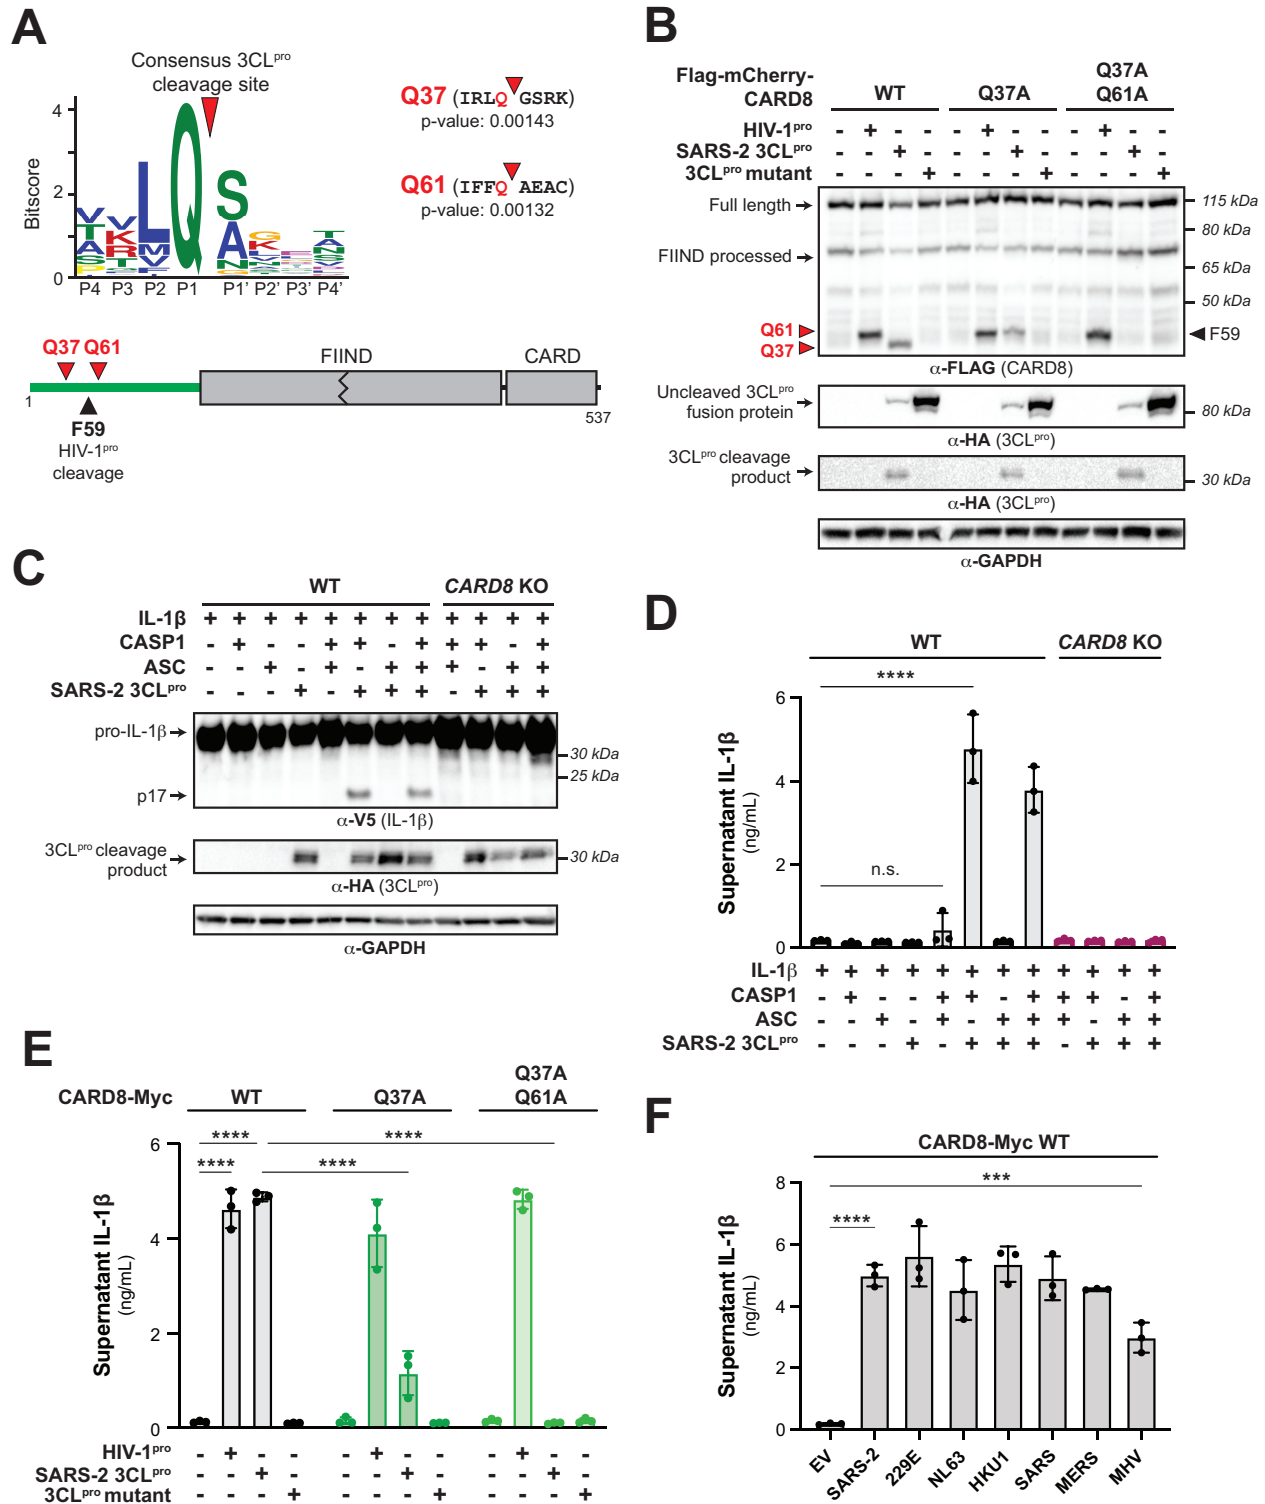

86

87 **Fig 1. 3CL<sup>pro</sup> from SARS-CoV-2 and other coronaviruses cleaves and activates the human**  
 88 **CARD8 inflammasome.** (A) A consensus betacoronavirus 3CL<sup>pro</sup> cleavage motif (*upper panel*,  
 89 Fig S1 and Methods) was used to predict two 3CL<sup>pro</sup> cleavage sites (red triangles) within the  
 90 disordered ‘tripwire’ N-terminus of human CARD8 (*lower panel*, green) near the described site

91 of HIV-1<sup>pro</sup> cleavage (black triangle). Flanking residues and p-values of prediction for each site  
92 (Q37 and Q61) are shown. (B) HEK293T cells were transfected with the indicated CARD8  
93 construct in the presence ('+') or absence ('-') of indicated proteases. Active (SARS-2 3CL<sup>pro</sup>) or  
94 catalytically inactive (3CL<sup>pro</sup> mutant) protease from SARS-CoV-2 was expressed as an HA-  
95 tagged fusion construct (Fig S2). HIV-1<sup>pro</sup> was expressed from an untagged gag-pol construct.  
96 Triangles are as described in (A). (C-D) WT or *CARD8* KO HEK293T cells were transfected  
97 with ('+') or without ('-') indicated constructs. Inflammasome activation was monitored by  
98 immunoblotting for mature IL-1 $\beta$  (p17) (C) or measuring culture supernatant levels of bioactive  
99 IL-1 $\beta$  using IL1R-expressing reporter cells (D). (E-F) *CARD8* KO HEK293T cells were co-  
100 transfected with the indicated CARD8 and protease constructs and supernatant levels of  
101 bioactive IL-1 $\beta$  were measured by IL1R reporter assay. 3CL<sup>pro</sup>s from the following viruses were  
102 used: HCoV-229E (229E), HCoV-NL63 (NL63), HCoV-HKU1 (HKU1), SARS-CoV (SARS),  
103 MERS-CoV (MERS), mouse hepatitis virus (MHV). (D-F) Individual values (n=3), averages,  
104 and standard deviations shown are representative of experiments performed in triplicate. Data  
105 were analyzed using two-way ANOVA with Šidák's post-test (D-E) or one-way ANOVA with  
106 Tukey's post-test (F). \*\*\* = p<0.001, \*\*\*\* = p<0.0001, n.s. = not significant.  
107

108 HEK293T cells with only CASP1, pro-IL-1 $\beta$ , and SARS-CoV-2 3CL<sup>pro</sup> resulted in robust  
109 CASP1-dependent processing of pro-IL-1 $\beta$  to mature bioactive IL-1 $\beta$  (p17) as measured by  
110 immunoblot or IL-1 $\beta$  reporter assay (see **Methods**) (**Fig 1, C and D**). Inflammasome activation  
111 was not observed in cells in *CARD8* knock out (KO) cells.

112  
113 For both NLRP1 and *CARD8*, N-terminal proteolytic cleavage can activate CASP1 in a  
114 reconstituted inflammasome assay (10-12, 14, 24). Validating a prior observation that *CARD8* is  
115 endogenously expressed in some HEK293T cell lines (12), transfection of our HEK293T cells  
116 with CASP1, pro-IL-1 $\beta$ , and SARS-CoV-2 3CL<sup>pro</sup> resulted in robust CASP1-dependent  
117 processing of pro-IL-1 $\beta$  to mature bioactive IL-1 $\beta$  (p17) as measured by immunoblot or IL-1 $\beta$   
118 reporter assay (**Fig 1, C and D**). We found that inflammasome activation was *CARD8*-  
119 dependent since we did not observe CASP1-processed IL-1 $\beta$  in HEK293T *CARD8* knock out  
120 (KO) cells. To confirm that SARS-CoV-2 3CL<sup>pro</sup> cleavage of *CARD8* is responsible for  
121 inflammasome activation, we complemented *CARD8* KO cells with WT *CARD8* or cleavage site  
122 mutants. Complementation with WT *CARD8* rescued both HIV-1<sup>pro</sup> and 3CL<sup>pro</sup>-induced  
123 inflammasome activation (**Fig 1E and S3 Fig**). In contrast, whereas *CARD8* cleavage site  
124 mutants had no effect on HIV-1<sup>pro</sup>-induced inflammasome activation, 3CL<sup>pro</sup>-induced  
125 inflammasome activation was reduced or abolished in *CARD8* KO cells complemented with  
126 *CARD8* Q37A or *CARD8* Q37A Q61A, respectively (**Fig 1E and S3 Fig**). These results validate  
127 that 3CL<sup>pro</sup> site-specific cleavage is required for *CARD8* inflammasome activation. As expected,  
128 3CL<sup>pro</sup> inflammasome activation did not occur in *CARD8* KO cells complemented with the  
129 *CARD8* FIIND auto-processing mutant S297A mutant (**S4 Fig**) (12, 25, 26). Taken together, our

130 results indicate that human CARD8 senses the proteolytic activity of the SARS-CoV-2 3CL<sup>pro</sup>,  
131 which drives inflammasome activation via functional degradation.

132

133 To test if proteases from other coronaviruses also cleave CARD8, we cloned 3CL<sup>proS</sup> from other  
134 human-relevant beta-coronaviruses (SARS-CoV (SARS), MERS-CoV (MERS), HCoV-HKU1  
135 (HKU1), two human alpha-coronaviruses (HCoV-229E (229E) and HCoV-NL63 (NL63), and  
136 the mouse beta-coronavirus murine hepatitis virus (MHV) (**S5 Fig**). Consistent with their  
137 structural and cleavage motif similarity (27), we found that every tested 3CL<sup>pro</sup> was able to  
138 cleave and activate CARD8 in a site-specific manner (**Fig 1F and S6 Fig**). Thus, effector-  
139 triggered immunity by human CARD8 is a conserved pathway for sensing of both endemic and  
140 pandemic human coronaviruses.

141

#### 142 **Coronavirus infection activates the CARD8 inflammasome**

143 We next evaluated the consequences of CARD8 inflammasome activation by infecting the  
144 human monocyte-like cell line THP-1 with HCoV-229E. We found that HCoV-229E infected  
145 WT but not two independently-derived *CARD8* KO THP-1 cell lines underwent significant cell  
146 death (**Fig 2A**) and release of IL-1 $\beta$  (**Fig 2B**), a result similar to treatment with Val-boroPro  
147 (VbP), which specifically activates the CARD8 inflammasome in myeloid and lymphoid  
148 lineages (26, 28) (**S7 Fig**). SARS-CoV-2 infection (29, 30) or uptake via Fc $\gamma$ R-mediated  
149 antibody-dependent enhancement (31) by monocytes or macrophages induces inflammasome  
150 activation. To determine if CARD8 senses and responds to SARS-CoV-2 infection in THP-1  
151 cells, we engineered WT or *CARD8* KO THP-1 cells to express ACE2 and TMPRSS2 (THP-  
152 1<sup>A+T</sup>). As with HCoV-229E, we found that SARS-CoV-2 infection of THP-1<sup>A+T</sup> WT but not

153

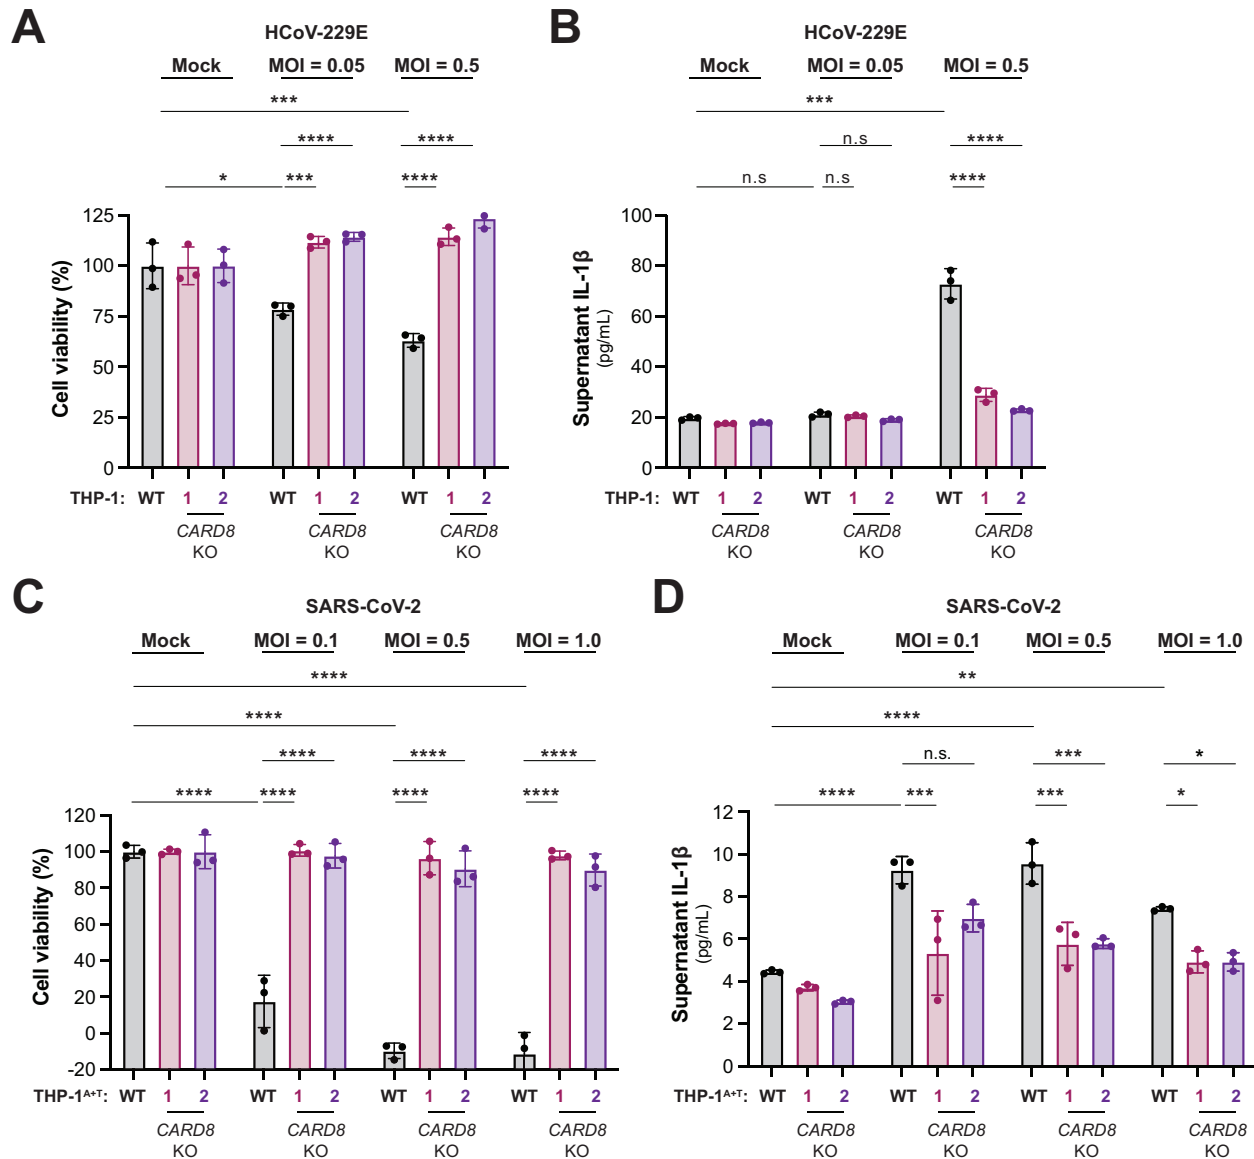

154

155

156

157

158

159

160

161

162

163

**Fig 2. Coronavirus infection activates the CARD8 inflammasome in THP-1 cells.** WT, *CARD8* KO1, and *CARD8* KO2 THP-1 cells (A-B) or THP-1 cells expressing ACE2 and TMPRSS2 (THP-1<sup>T+A</sup>) (C- D) were primed with 0.5 μg/mL Pam3CSK4 for 6h, followed by infection with the coronaviruses hCoV-229E (A-B) or SARS-CoV-2 (SARS-2) (C-D) at the indicated multiplicity of infection (MOI). 48h post-infection, cell viability (A, C) was measured using the Cell Titer Glo assay and IL-1β levels were measured using the IL1R reporter assay (B, D) as in Fig 1D. Data presented are representative of experiments performed at least twice. Data were analyzed using two-way ANOVA with Šidák's post-test: \* = p<0.05, \*\* = p<0.01, \*\*\* = p<0.001, \*\*\*\* = p<0.0001, n.s. = non-significant.

164 *CARD8* KO cells induced both cell death and IL-1 $\beta$  release (**Fig 2, C and D**). Our results  
165 demonstrate that *CARD8* is a bona fide innate immune sensor of viral infection.

166

167 **Inter- and intra-host diversity in *CARD8* impacts inflammatory responses to coronavirus**  
168 **proteases**

169 Host-virus interactions, including those between viral proteases and host cleavage targets, are  
170 often engaged in evolutionary arms races that shape the specificity of host-virus interactions (15,  
171 32-34). Indeed, we have previously shown that the *CARD8* homolog and viral protease sensor,  
172 *NLRP1*, has been duplicated and recurrently lost across mammalian evolution. *NLRP1* also has  
173 strong signatures of positive selection in an N-terminal region of the protein that is cleaved by  
174 pathogen-encoded proteases, which we refer to as the ‘tripwire’ region due to its role in virus  
175 detection and subsequent inflammasome activation (11, 24). We thus predicted that *CARD8* may  
176 have a similarly dynamic evolutionary history, and that host inter- and intraspecies variation  
177 would underlie differences in *CARD8* cleavage and inflammasome activation by coronavirus  
178 3CL<sup>pro</sup>.

179

180 We first found that both *CARD8* and *NLRP1* are each present in only certain mammalian  
181 lineages, consistent with their dynamic roles in host defense as opposed to dedicated  
182 housekeeping functions (**Fig 3A**). For instance, we found that within the order *Chiroptera* (bats),  
183 microbats retain a *NLRP1* ortholog but have lost *CARD8*, whereas megabats have lost *NLRP1*  
184 and only encode *CARD8*. Because bats serve as main reservoir hosts of emerging coronaviruses  
185 (35, 36), but is missing from microbats, we tested if the *CARD8* inflammasome could serve as a  
186 sensor for 3CL<sup>pro</sup> in the megabat species *Rousettus aegyptiacus*. Unlike human *CARD8*, the *R.*

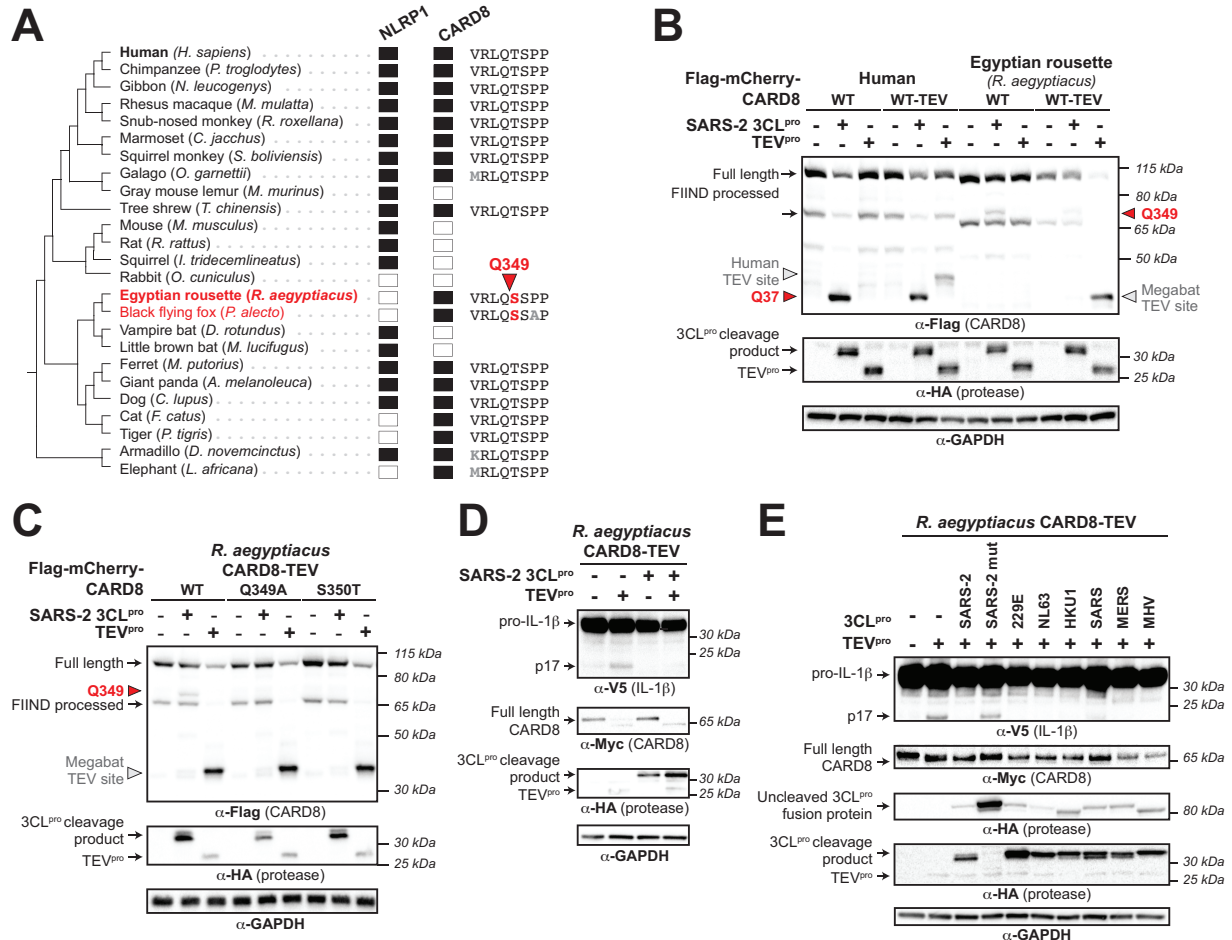

187  
 188 **Fig 3. Megabat CARD8 is antagonized rather than activated by coronavirus 3CL<sup>pro</sup>.** (A)  
 189 Presence (filled rectangle) or absence (empty rectangle) of predicted *NLRP1* or *CARD8*  
 190 orthologs in the indicated mammalian species. To the left is a species phylogeny. Megabat  
 191 species are indicated in red. To the right is an alignment of a predicted 3CL<sup>pro</sup> cleavage site in  
 192 *Roussettus aegyptiacus* CARD8 (red triangle indicates site and number indicates residue  
 193 position). (B) Human CARD8 or *R. aegyptiacus* CARD8 was co-transfected with either SARS-  
 194 CoV-2 (SARS-2) 3CL<sup>pro</sup> or protease from tobacco etch virus (TEV<sup>pro</sup>). For human or *R.*  
 195 *aegyptiacus* CARD8 constructs labeled “WT-TEV”, a TEV<sup>pro</sup> site was introduced into the N-  
 196 terminus. The red triangles and amino acid number indicates the sites of 3CL<sup>pro</sup> cleavage in  
 197 human and *R. aegyptiacus* CARD8. The gray triangles indicate the sites of TEV protease  
 198 cleavage within each CARD8 WT-TEV. (C) Mapping of the 3CL<sup>pro</sup> site within *R. aegyptiacus*  
 199 CARD8 was performed by transfecting the indicated point mutants with SARS-CoV-2 (SARS-2)  
 200 3CL<sup>pro</sup> or TEV<sup>pro</sup>. 3CL<sup>pro</sup> and TEV<sup>pro</sup> sites are marked by triangles as in (B). (D) *CARD8* KO  
 201 HEK293T cells were co-transfected with *R. aegyptiacus* IL-1 $\beta$  and CASP1, along with the  
 202 indicated CARD8 and protease constructs. Presence of mature IL-1  $\beta$  (p17) upon TEV<sup>pro</sup> addition  
 203 indicates successful reconstitution of the *R. aegyptiacus* CARD8 inflammasome, whereas  
 204 absence of p17 upon SARS-2 3CL<sup>pro</sup> indicates antagonism of the *R. aegyptiacus* CARD8  
 205 inflammasome. (E) *R. aegyptiacus* CARD8 inflammasome activation assays were performed as  
 206 in (D) with the indicated 3CL<sup>pro</sup> constructs.



207 *aegyptiacus* CARD8 (CARD8<sub>Ra</sub>) N-terminus lacks sites Q37 and Q61 and was not cleaved by  
208 SARS-CoV-2 3CL<sup>pro</sup>. We did, however, observe a cleavage product that matched a predicted  
209 3CL<sup>pro</sup> site at Q349 in CARD8<sub>Ra</sub> downstream of the FIIND auto-processing site in the  
210 inflammasome-forming C-terminus (**Fig 3, A and B**). Interestingly, megabats are the only  
211 mammals with a serine in the P1' position of the cleavage site (**Fig 3A and S8 Fig**), which is  
212 preferred for cleavage based on our computational model (**Fig 1A**). Indeed, a threonine in this  
213 position (S350T), which is found in human CARD8 as well as most other mammals, prevents  
214 cleavage of CARD8<sub>Ra</sub> by SARS-CoV-2 3CL<sup>pro</sup> (**Fig 3C and S8 Fig**). We next wished to test the  
215 functional effect of 3CL<sup>pro</sup> on the megabat CARD8 inflammasome. First, we determined if  
216 functional degradation could activate megabat CARD8 by inserting a TEV<sup>pro</sup> cleavage site into  
217 the N-terminus of CARD8<sub>Ra</sub>, permitting TEV<sup>pro</sup> cleavage of CARD8<sub>Ra</sub>-TEV but not WT  
218 CARD8<sub>Ra</sub>. When co-expressed with CASP1 and pro-IL-1 $\beta$  from *R. aegyptiacus*, TEV<sup>pro</sup>  
219 cleavage of CARD8<sub>Ra</sub>-TEV resulted in inflammasome activation, indicating that we can  
220 reconstitute the *R. aegyptiacus* CARD8 inflammasome in human cells (**Fig 3D**). Using this  
221 reconstitution system, we found that SARS-CoV-2 3CL<sup>pro</sup> does not activate, and in fact  
222 antagonizes TEV-mediated CARD8<sub>Ra</sub> inflammasome activation (**Fig 3D**), similar to our previous  
223 observations of viral proteases that antagonize the activation of the NLRP1 inflammasome (11).  
224 We further found that all 3CL<sup>pro</sup>s that we tested can instead prevent TEV<sup>pro</sup>-mediated activation  
225 of the CARD8<sub>Ra</sub> inflammasome (**Fig 3E**). Together with the loss of CARD8 from many bat  
226 species, these data provide a putative mechanism of disease tolerance that protects bats from  
227 immunopathogenic effects of inflammasome activation.

228



229 We next focused on the evolution of human *CARD8*. Supporting a previous genome-wide study  
230 (37), we found evidence that *CARD8* has evolved under recurrent positive selection in hominoids  
231 and Old World monkeys, which we find is primarily driven by the N-terminal region of the  
232 protein (**Fig 4A**). Codon-based analyses also show that positively selected sites are  
233 predominantly found in the N-terminus, including a codon at position 60 that lies in the HIV-1<sup>pro</sup>  
234 site and the secondary coronavirus 3CL<sup>pro</sup> site (**Fig 4B, S9 Fig, and S5 Table**). We thus infer  
235 that, like NLRP1, the *CARD8* disordered N-terminus is a molecular ‘tripwire’ that is rapidly  
236 evolving to mimic viral polyprotein sites and sense diverse viral proteases. We further analyzed  
237 the human population for non-synonymous SNPs in *CARD8* (**Fig 4B**). Within the N-terminus,  
238 we found several high frequency human SNPs, including a S39P variant that resides at the P2’  
239 position within the 3CL<sup>pro</sup> cleavage site and is present in >20% of all sampled African and  
240 African American individuals (GnomAD v3.1.2 (38)) (**S9 Fig and S5 and S6 Tables**).  
241 Strikingly, while *CARD8* S39 and P39 variants are similarly cleaved and activated by HIV-1<sup>pro</sup>,  
242 the *CARD8* P39 variant exhibits reduced sensitivity to cleavage and activation by coronavirus  
243 3CL<sup>pro</sup>s (**Fig 4, C and D, and S10 Fig**). This is reinforced by our observation that a proline in the  
244 P2’ position is never found in the >10,000 polyprotein cleavage sites we sampled from beta-  
245 CoVs (**S1 Table**). In contrast, another human SNP (R40W) found in approximately 1 in every  
246 2000 alleles (**S5 Table**), does not detectably affect *CARD8* cleavage in our assays (**Fig 4, C and**  
247 **D**). These data suggest that standing genetic variation in human *CARD8* underlies differential  
248 sensing and inflammasome responses to coronavirus infection.

249

250

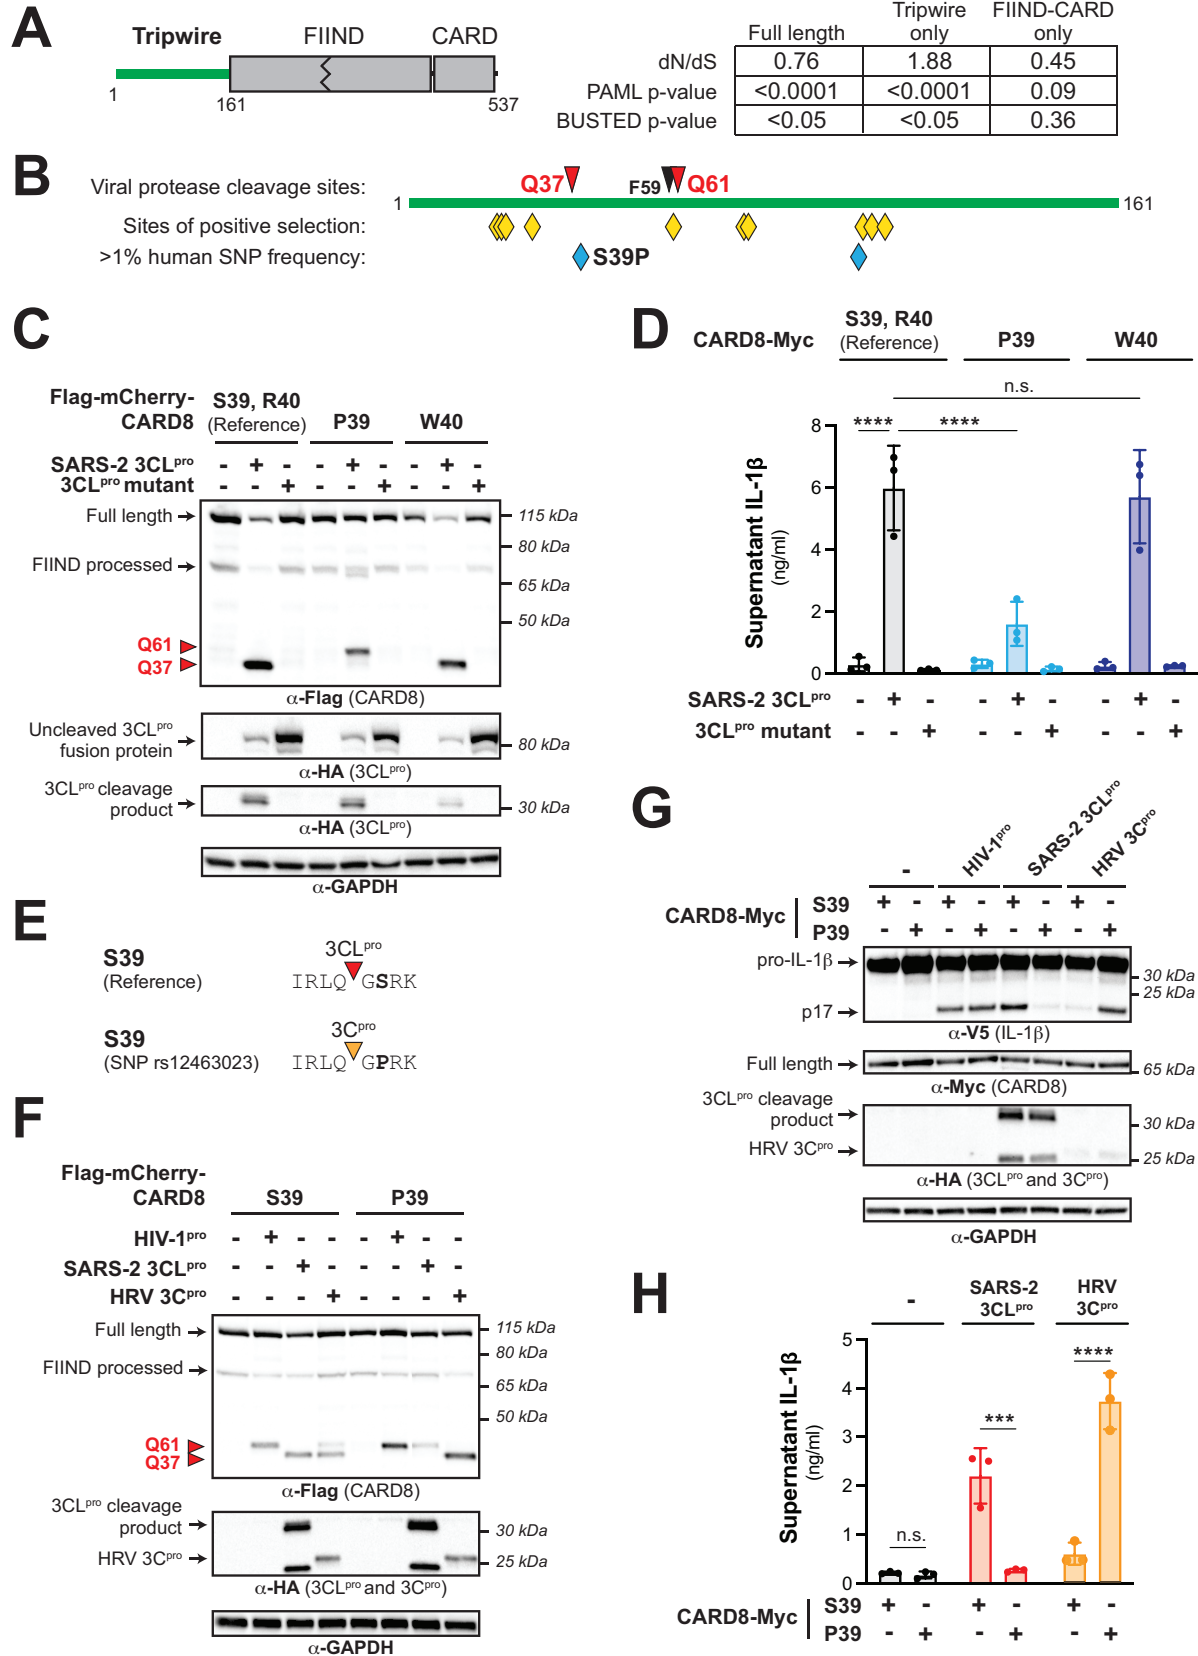

252 **Fig 4. Human polymorphism in CARD8 reduces sensing of coronavirus 3CL<sup>pro</sup> while**  
253 **increasing sensing of select picornavirus 3C<sup>pro</sup>s.** (A) Evolutionary analyses of positive  
254 selection were performed on full length *CARD8* (encoding residues 1-537), the disordered N-  
255 terminal ‘tripwire’ region (encoding residues 1-161), and the FIIND-CARD region (encoding  
256 residues 162-537). P-values from PAML and BUSTED analyses are shown, along with the  
257 dN/dS value obtained from PAML. (B) Schematic of the *CARD8* ‘tripwire’ region. Red and  
258 black triangles and amino acid numbers indicate sites of 3CL<sup>pro</sup> and HIV-1<sup>pro</sup> cleavage  
259 respectively. Yellow diamonds indicate codons predicted to be evolving under positive selection  
260 by at least one evolutionary analysis (table S4). Blue diamonds indicate high frequency (>1%  
261 allele frequency) non-synonymous single nucleotide polymorphisms (SNPs) in humans (table S5  
262 and S6). The position of the S39P substitution that results from SNP rs12463023 is shown. (C-D)  
263 Reference human *CARD8* (S39, R40) or human *CARD8* variants (P39 or W40) were co-  
264 expressed with the indicated protease construct and assayed for 3CL<sup>pro</sup>-mediated cleavage (C) or  
265 *CARD8* inflammasome activation (D). (E) Amino acid sequence surrounding the Q37 cleavage  
266 site for S39 (reference) and P39 variants of human *CARD8*. Triangles mark sites of cleavage by  
267 the indicated viral protease (F-H). Human *CARD8* S39 or *CARD8* P39 were transfected with the  
268 indicated proteases and assayed for 3CL<sup>pro</sup>-mediated cleavage (F) or *CARD8* inflammasome-  
269 mediated maturation of IL-1 $\beta$  (G) or the release of bioactive IL-1 $\beta$  (H). HRV 3C<sup>pro</sup> = human  
270 rhinovirus 3C<sup>pro</sup>. Individual values (n=3), averages, and standard deviations shown are  
271 representative of experiments performed in triplicate. Data were analyzed using two-way  
272 ANOVA with Šidák's post-test. \*\*\* = p<0.001, \*\*\*\* = p<0.0001, n.s. = not significant.

273 **A human SNP confers a specificity switch for CARD8 sensing of coronavirus 3CL<sup>pro</sup> and**  
274 **human rhinovirus 3C<sup>pro</sup>**

275 Finally, we considered if the CARD8 P39 variant, in addition to affecting sensing of coronavirus  
276 3CL<sup>pro</sup>s, also alters recognition of other pathogens. We noticed that although a P2' proline is  
277 disfavored in our model for 3CL<sup>pro</sup> cleavage, a P2' proline is strongly preferred in our model for  
278 enterovirus 3C<sup>pro</sup> cleavage (11). Indeed, our 3C<sup>pro</sup> motif search (11) identified a cleavage site in  
279 CARD8 P39 but not CARD8 S39 (**Fig 4E and S11 Fig**). Validating these bioinformatic  
280 predictions, cleavage assays with the 3C<sup>pro</sup> from the respiratory picornavirus, human rhinovirus  
281 (HRV), revealed that HRV 3C<sup>pro</sup> cleavage of human CARD8 at site Q37 is considerably more  
282 pronounced for the P39 variant than the S39 variant (**Fig 4F**). Likewise, we found that  
283 inflammasome activation by HRV 3C<sup>pro</sup> was nearly absent in HEK293T *CARD8* KO cells  
284 complemented with CARD8 S39, whereas we observed robust inflammasome activation in cells  
285 complemented with CARD8 P39 – the opposite sensitivity observed for SARS-CoV-2 3CL<sup>pro</sup>  
286 (**Fig 4, G and H**). Finally, we found that CARD8 variation also impacted cleavage by other  
287 picornavirus 3C<sup>pro</sup>s. For example, 3C<sup>pro</sup>s from enterovirus D68 (EV68) and poliovirus (PV1) were  
288 better sensed by CARD8 P39, whereas the Aichi virus 3C<sup>pro</sup> was better sensed by the S39  
289 CARD8 variant (**S12 Fig**). Thus, a single amino acid change in CARD8 functions as a viral-  
290 specificity switch, underscoring the importance of pathogen-driven evolution in shaping  
291 inflammasome responses.

292

293 **Discussion**

294 As is clear from the ongoing COVID-19 pandemic, understanding the molecular mechanisms  
295 that drive viral sensing and inflammatory pathogenesis during infection remains key to

296 developing rationalized, host-directed treatments to support antiviral defense or quell severe  
297 disease. CARD8 is expressed in airway epithelia (10, 39, 40) and other cell types, including  
298 monocytes and T cells (26, 28, 41) that are physiologically relevant for respiratory coronaviruses  
299 and picornaviruses (39, 40, 42), including SARS-CoV-2 (29-31). Our data showing that SARS-  
300 CoV-2 infection activates the CARD8 inflammasome in THP-1 cells supports findings that  
301 inflammasome activation contributes to severe COVID-19, and suggests that the CARD8  
302 inflammasome in monocytes and macrophages contribute to inflammation in COVID-19  
303 patients.

304  
305 Based on our results and the finding that FcγR-mediated uptake of SARS-CoV-2 virions into  
306 monocytes leads to abortive infection (31), we speculate that CARD8-dependent pyroptosis  
307 contributes to the poor permissiveness of myeloid cells for SARS-CoV-2 (43), wherein the  
308 myeloid compartment may not substantially contribute to viral load but likely impacts  
309 immunopathology via inflammasome-driven inflammation (44, 45). Prior reports have proposed  
310 a similar role for the NLRP3 inflammasome in myeloid cells (29-31). We favor a unifying model  
311 in which CARD8-dependent GSDMD pore formation contributes to NLRP3 inflammasome  
312 activation, which also offers an explanation for CARD8-dependent release of IL-1β (46).

313 Interestingly, the SARS-CoV-2 3CL<sup>pro</sup> also cleaves and activates NLRP1 in airway epithelia (9).  
314 This results in cell death via a non-canonical NLRP1>CASP8>CASP3>GSDME inflammasome  
315 pathway, suggesting that the cellular context of inflammasome responses may uniquely shape  
316 antiviral defense and/or inflammation. We also note that seasonal coronaviruses are capable of  
317 activating CARD8, and we speculate that a multitude of variables such as cell tropism shape the  
318 outcome of virus-induced inflammasome activation in antiviral immunity and pathogenesis.

319 Nevertheless, given the impact of SNPs on human CARD8 sensing of pathogenic viruses, it is  
320 tempting to speculate that diminished CARD8 inflammasome activation may be a contributing  
321 factor to variation in COVID-19 disease outcomes, and more generally for other human  
322 pathogenic coronavirus and picornavirus infections. Further studies are required to establish this  
323 connection.

324

325 Taken together, our findings establish CARD8 as a rapidly evolving, polymorphic, innate  
326 immune sensor of infection by positive-sense RNA viruses. We demonstrate that CARD8 has the  
327 capacity to detect viral proteases from at least three viral families that include important human  
328 pathogens: *Coronaviridae*, *Picornaviridae*, and *Retroviridae*. These findings also build on the  
329 emerging concept that ETI is an important mechanism of pathogen recognition, including the use  
330 of host mimicry of viral polyprotein cleavage motifs as an evolutionary strategy in the ongoing  
331 arms race between host and viruses.

332

### 333 **Materials and Methods**

#### 334 *Motif generation and search*

335 To build the betacoronavirus (betaCoV) 3CL<sup>pro</sup> cleavage motif, 995 nonredundant betaCoV  
336 polyprotein sequences were collected from the Viral Pathogen Resource (ViPR) (47) and aligned  
337 with five well-annotated reference enteroviral polyprotein sequences from RefSeq (**S1 Fig, A**  
338 **and B**). P1 and P1' of the annotated cleavage sites across the RefSeq sequences served as  
339 reference points for putative cleavage sites across the 995 ViPR sequences (**S1 Table**). Four  
340 amino acid residues upstream (P4-P1) and downstream (P1'-P4') of each cleavage site were  
341 extracted from every MAFFT-aligned (48) polyprotein sequence, resulting in 1000 sets of

342 cleavage sites (RefSeq sites included) (**S1 Table**). Each set of cleavage sites representative of  
343 each polyprotein was then concatenated (**S2 Table**). Next, duplicates were removed from the  
344 concatenated cleavage sites (**S2 Table**). The remaining 60 nonredundant, concatenated cleavage  
345 sites were then split into individual 8-mer cleavage sites and were aligned using MAFFT (48) to  
346 generate Geneious-defined (49) sequence logo information at each aligned position (**S2 Table**).  
347 Pseudo-counts to the position-specific scoring matrix were adjusted as described previously (11)  
348 and a motif p-value cut-off of 0.00231 corresponding to detection of 99% of the initial  
349 polyprotein cleavage sites was selected (**S1 FigC**).

350

#### 351 *Sequence alignments and phylogenetic trees*

352 Complete polyprotein sequences from 60 betaCoVs with non-redundant cleavage sites (see  
353 ‘Motif generation and search’ section above) were downloaded from ViPR. Sequences were  
354 aligned using MAFFT (48) and a neighbor-joining phylogenetic tree was generated using  
355 Geneious software (49).

356

#### 357 *Evolutionary analyses*

358 For phylogenomic analyses of CARD8 and NLRP1 (**Fig 3A**), human CARD8 (accession  
359 NP\_001338711) and human NLRP1 (accession NP\_127497.1) were used as BLASTP (50)  
360 search queries against the indicated mammalian proteomes (**Fig 3A**). A species was determined  
361 to have an ortholog if it had a protein with >50% sequence identity, >70% sequence coverage,  
362 and was the bi-directional best hit to the indicated human protein. The species tree shown in **Fig**  
363 **3A** is based on NCBI Common Tree  
364 (<https://www.ncbi.nlm.nih.gov/Taxonomy/CommonTree/wwwcmt.cgi>). To identify regions of

365 mammalian CARD8s that are orthologous to the 3CL<sup>pro</sup> cleavage site (Q349) in *Rousettus*  
366 *aegyptiacus* CARD8, a 50 amino acid region of *R. aegyptiacus* CARD8 that was centered on the  
367 Q349 cleavage site was used as a BLASTP query against the entire RefSeq protein database with  
368 a 60% sequence identity cut-off. A single CARD8 sequence from each species (**S8 Fig**) was  
369 aligned using MAFFT (48) and trimmed to only include the eight amino acid spanning the  
370 cleavage site.

371 For positive selection analyses, primate nucleotide sequences that aligned to human full  
372 length CARD8 (Protein: NP\_001338711, mRNA: NM\_001351782.2) were downloaded from  
373 NCBI and aligned using MAFFT (48). Only eight other primate sequences, only from hominoids  
374 and Old World monkeys, were fully alignable to full length human CARD8 (sequence accessions  
375 in table S3). Maximum likelihood (ML) tests were performed with codeml in the PAML  
376 software suite (51) or using BUSTED (52) on the DataMonkey (53) server. For PAML, aligned  
377 sequences were subjected to ML tests using NS sites models disallowing (M7) or allowing (M8)  
378 positive selection. The p-value reported is the result of a chi-squared test on twice the difference  
379 of the log likelihood (lnL) values between the two models using two degrees of freedom. We  
380 confirmed convergence of lnL values by performing each analysis using two starting omega  
381 (dN/dS) values (0.4 and 1.5). Results are reported from analyses using the F61 codon frequency  
382 model. Analyses with the F3x4 model gave similar results. For evolutionary analyses of regions  
383 of CARD8, the full-length alignment was truncated to only include codons 1-161 ('tripwire'  
384 region) or 162-537 (FIIND-CARD region) and PAML or BUSTED analyses were performed as  
385 described above.

386 We used three independent methods to estimate individual codons within CARD8 that  
387 have been subject to positive selection (**S4 Table**). PAML was used to identify positively



388 selected codons with a posterior probability greater than 0.90 using a Bayes Empirical Bayes  
389 (BEB) analysis and the F61 or F3x4 codon frequency models. The same CARD8 alignment was  
390 also used as input for FEL (54) and FUBAR (55) using the DataMonkey (53) server. In both  
391 cases, default parameters were used and codons with a signature of positive selection with a p-  
392 value of <0.1 are reported. In all cases, codon numbers correspond to the amino acid position and  
393 residue in human CARD8 (NCBI accession NP\_001338711).

394

### 395 *Plasmids and constructs*

396 Megabat CARD8, CASP1, IL-1 $\beta$ , and all 3CL<sup>pro</sup> sequences were ordered as either gBlocks  
397 (Integrated DNA Technologies, San Diego, CA) or Twist Gene Fragments (Twist Biosciences,  
398 South San Francisco, CA). All sequences are found in **S7 Table**. Vectors containing the coding  
399 sequences of human CARD8, ASC, human CASP1, human IL-1 $\beta$ -V5, and TEV<sup>pro</sup> were  
400 previously described (24). Vector psPAX2 containing the untagged coding sequence for HIV-1  
401 gag-pol was a gift from Didier Trono (Addgene plasmid # 12260).

402 For CARD8 cleavage assays, the coding sequences of human CARD8 (NCBI accession  
403 NP\_001171829.1), human CARD8 mutants (Q37A, Q37A Q61A, S39P, R40W), human CARD8  
404 TEV, *Rousettus aegyptiacus* (megabat) CARD8 (NCBI accession XP\_016010896), and megabat  
405 CARD8 TEV were cloned into the pcDNA5/FRT/TO backbone (Invitrogen, Carlsbad, CA) with  
406 an N-terminal 3xFlag-mCherry tag. For CARD8 activation, the same sequences were cloned into  
407 the pQCXIP vector backbone (Takara Bio, Mountain View, CA) with a C-terminal Myc tag.  
408 Megabat CASP1 (NCBI accession KAF6464288) and megabat IL-1 $\beta$  (NCBI accession  
409 KAF6447073), also from *Rousettus aegyptiacus*, were cloned in the same vector as their  
410 respective human orthologues. 3CL<sup>pro</sup> sequences were cloned with an N-terminal HA tag into the

411 QCXIP vector backbone, flanked by polyprotein cleavage sites fused to N-terminal eGFP and C-  
412 terminal mCherry (**S2 Fig**). 3C<sup>pro</sup> constructs were described previously (*11*).

413 Single point mutations were made using overlapping stitch PCR. All plasmid stocks were  
414 sequenced across the entire inserted region to verify that no mutations were introduced during  
415 the cloning process. The primers used for cloning are described in **S7 Table**.

416

#### 417 *Cell culture and transient transfection*

418 All cell lines (HEK293T, HEK-Blue-IL-1 $\beta$ ) are routinely tested for mycoplasma by PCR kit  
419 (ATCC, Manassas, VA) and kept a low passage number to maintain less than one year since  
420 purchase, acquisition or generation. HEK293T cells were obtained from ATCC (catalog # CRL-  
421 3216) and HEK-Blue-IL-1 $\beta$  cells were obtained from Invivogen (catalog # hkb-il1b) and all lines  
422 were verified by those sources, and were grown in complete media containing DMEM (Gibco,  
423 Carlsbad, CA), 10% FBS, and appropriate antibiotics (Gibco, Carlsbad, CA). THP-1 cells were  
424 purchased from ATCC, and grown in complete media containing RPMI (Gibco, Carlsbad, CA)  
425 10% FBS, and 1% L-glutamine. For transient transfections, HEK293T cells were seeded the day  
426 prior to transfection in a 24-well plate (Genesee, El Cajon, CA) with 500  $\mu$ l complete media.  
427 Cells were transiently transfected with 500 ng of total DNA and 1.5  $\mu$ l of Transit X2 (Mirus Bio,  
428 Madison, WI) following the manufacturer's protocol. HEK-Blue IL-1 $\beta$  reporter cells (Invivogen,  
429 San Diego, CA) were grown and assayed in 96-well plates (Genesee, El Cajon, CA).

430

#### 431 *Generation of knockout and transgenic cell lines*

432 *CARD8* knockouts in HEK293T cells were generated similarly to *NLRP1* knockouts described in  
433 (*11*). Briefly, lentivirus-like particles were made by transfecting HEK293T cells with the

434 plasmids psPAX2 (gift from Didier Trono, Addgene plasmid # 12260), pMD2.G (gift from  
435 Didier Trono, Addgene plasmid # 12259), and either pLB-Cas9 (gift from Feng Zhang, Addgene  
436 plasmid # 52962) (56) or plentiGuide-Puro, which was adapted for ligation-independent cloning  
437 (gift from Moritz Gaidt) (57). Conditioned supernatant was harvested 48 and 72 hours post-  
438 transfection and used for spinfection of HEK293T cells at 1200 x g for 90 minutes at 32°C.  
439 Forty-eight hours post-spinfection, cells with stable expression of Cas9 were selected in media  
440 containing 100 µg/ml blasticidin. Blasticidin-resistant cells were then transduced with sgRNA-  
441 encoding lentivirus-like particles, and selected in media containing 0.5 µg/ml puromycin. Cells  
442 resistant to blasticidin and puromycin were single cell cloned by limiting dilution in 96-well  
443 plates, and confirmed as knockouts by Sanger sequencing. *CARD8* knockout THP-1 cells were  
444 generated as described previously (58). Briefly, a *CARD8* specific sgRNA was designed using  
445 CHOPCHOP (59), and cloned into a plasmid containing U6-sgRNA-CMV-mCherry-T2A-Cas9  
446 using ligation-independent cloning. THP-1 cells were electroporated using the BioRad  
447 GenePulser Xcell. After 24 h, mCherry-positive cells were sorted and plated for cloning by  
448 limiting dilution. Monoclonal lines were validated as knockouts by deep sequencing and  
449 OutKnocker analysis, as described previously (60, 61). Knockout lines were further validated by  
450 immunoblot and functional assays. sgRNA used to generate knockouts are described in **S7**  
451 **Table**. To make THP-1 cells susceptible to SARS-CoV-2 infection(62), ACE2 and TMPRSS2  
452 expressing THP-1 cells were made using the same lentiviral transduction protocol as described  
453 above, but using the transfer plasmid PpWIP-IRES-Bla-AK-ACE2-IRES-TMPRSS2 (gift from  
454 Sonja Best). THP-1 cells were selected with 10 µg/ml blasticidin.

455

456 *THP-1 treatments and viral infections*

457 50,000-100,000 THP-1 cells per well in 96-well round bottom plates in 50  $\mu$ l OptiMEM  
458 containing 500 ng/mL Pam3CSK4 for 6h, followed by treatment with Val-boroPro (10 $\mu$ M) or  
459 infection with the coronaviruses hCoV-229E (BEI NR-52726) or SARS-CoV-2 (USA/WA-  
460 1/2020, a gift from Dr. Ralph Baric) at indicated multiplicities of infection (MOIs). 48h post-  
461 treatment or infection, supernatants were harvested for the detection of IL-1 $\beta$  (see below). Cells  
462 were transferred to a white-walled 96-well assay plate and mixed with an equal volume of Cell  
463 Titer Glo reagent (Promega). Measurements for fluorescence at 544-15 nm (excitation), 620-20  
464 nm (emission) or luminescence at 555-70 (emission) were taken following incubation at room  
465 temperature, rocking for 10min.

466

#### 467 *CARD8 cleavage assays*

468 100 ng of epitope-tagged human CARD8 (WT, Q37A, Q37A Q61A, S39P, R40W), human  
469 CARD8 TEV, megabat CARD8 WT or megabat CARD8 TEV was co-transfected with either  
470 HA-tagged QCXIP empty vector ('-'), 250 ng of TEV<sup>pro</sup>, 250 ng of untagged HIV-1<sup>pro</sup> (HIV-1  
471 gag-pol carrying HIV-1 protease activity), 5 ng of HA-tagged 3CL<sup>pro</sup>, or 250 ng of HA-tagged  
472 3C<sup>pro</sup>-encoding constructs. Twenty-four hours post-transfection, the cells were harvested, lysed  
473 in 1x NuPAGE LDS sample buffer (Invitrogen, Carlsbad, CA) containing 5%  $\beta$ -mercaptoethanol  
474 (Fisher Scientific, Pittsburg, PA) and immunoblotted with antibodies described in **S8 Table**.

475

#### 476 *CARD8 activity assays*

477 To reconstitute the human CARD8 inflammasome, 100 ng of human CASP1 and 50 ng of human  
478 IL-1 $\beta$ -V5 were co-transfected with 50 ng of either HA-tagged QCXIP empty vector, wild-type or  
479 mutant pQCXIP-CARD8-Myc constructs in *CARD8* KO HEK293T cells. To reconstitute the

480 megabat CARD8 inflammasome, 10 ng of megabat CASP1 and 50 ng of megabat IL-1 $\beta$ -V5  
481 were co-transfected with 2 ng megabat CARD8 constructs in *CARD8* KO HEK293T cells. These  
482 cells were further co-transfected with either empty vector ('-'), 250 ng of TEV<sup>pro</sup>, 100 ng of  
483 untagged HIV-1 gag-pol (with HIV-1 protease activity), 5 ng of HA-tagged 3CL<sup>pro</sup>, 100 ng of  
484 HA-tagged enteroviral 3C<sup>pro</sup>, or 20 ng of HA-tagged non-enteroviral 3C<sup>pro</sup>-encoding constructs.  
485 Twenty-four hours post-transfection, cells were harvested and lysed in 1x NuPAGE LDS sample  
486 buffer containing 5%  $\beta$ -mercaptoethanol and immunoblotted with antibodies described in **S8**  
487 **Table** or culture media was harvested for quantification of IL-1 $\beta$  levels by HEK-Blue assays (see  
488 below). Appearance of the mature p17 band of IL-1 $\beta$  indicates successful assembly and  
489 activation of the inflammasome.

490

#### 491 *HEK-Blue IL-1 $\beta$ assay*

492 To quantify the levels of bioactive IL-1 $\beta$  released from cells, we employed HEK-Blue IL-1 $\beta$   
493 reporter cells (Invivogen, San Diego, CA). In these cells, binding to IL-1 $\beta$  to the surface receptor  
494 IL-1R1 results in the downstream activation of NF- $\kappa$ B and subsequent production of secreted  
495 embryonic alkaline phosphatase (SEAP) in a dose-dependent manner (*11*). SEAP levels are  
496 detected using a colorimetric substrate assay, QUANTI-Blue (Invivogen, San Diego, CA) by  
497 measuring an increase in absorbance at OD655.

498 Culture supernatant from inflammasome-reconstituted HEK293T cells or HEK293T  
499 *CARD8* KO cells that had been transfected with 3CL pro was added to HEK-Blue IL-1 $\beta$  reporter  
500 cells plated in 96-well format in a total volume of 200  $\mu$ l per well. On the same plate, serial  
501 dilutions of recombinant human IL-1 $\beta$  (Invivogen, San Diego, CA) were added to generate a  
502 standard curve for each assay. Twenty-four hours later, SEAP levels were assayed by taking 20

503  $\mu$ l of the supernatant from HEK-Blue IL-1 $\beta$  reporter cells and adding to 180  $\mu$ l of QUANTI-Blue  
504 colorimetric substrate following the manufacturer's protocol. After incubation at 37°C for 30–60  
505 min, absorbance at OD655 was measured on a BioTek Cytation five plate reader (BioTek  
506 Instruments, Winooski, VT) and absolute levels of IL-1 $\beta$  were calculated relative to the standard  
507 curve. All assays, beginning with independent transfections or infections, were performed in  
508 triplicate.

509

#### 510 *Immunoblotting and antibodies*

511 Harvested cell pellets were washed with 1X PBS, and lysed with 1x NuPAGE LDS sample  
512 buffer containing 5%  $\beta$ -mercaptoethanol at 98C for 10 min. The lysed samples were spun down  
513 at 15000 RPM for two minutes, followed by loading into a 4–12% Bis-Tris SDS-PAGE gel (Life  
514 Technologies, San Diego, CA) with 1X MOPS buffer (Life Technologies, San Diego, CA) and  
515 wet transfer onto a nitrocellulose membrane (Life Technologies, San Diego, CA). Membranes  
516 were blocked with PBS-T containing 5% bovine serum albumin (BSA) (Spectrum, New  
517 Brunswick, NJ), followed by incubation with primary antibodies for V5 (IL-1 $\beta$ ), FLAG  
518 (mCherry-fused CARD8 for protease assays), Myc (CARD8-Myc for activation assays), HA  
519 (viral protease), or GAPDH. Membranes were rinsed three times in PBS-T then incubated with  
520 the appropriate HRP-conjugated secondary antibodies. Membranes were rinsed again three times  
521 in PBS-T and developed with SuperSignal West Pico PLUS Chemiluminescent Substrate  
522 (Thermo Fisher Scientific, Carlsbad, CA). The specifications, source, and clone info for  
523 antibodies are described in **S8 Table**.

524

525

526 **Acknowledgments**

527 We thank all members of the Daugherty and Mitchell laboratories and Michael Emerman for  
528 helpful discussions. We thank Joshua Marceau, Nell Baumgarten, and Julie Overbaugh for  
529 providing HCoV-229E resources and expertise.

530

531 **References**

- 532 1. J. D. Jones, R. E. Vance, J. L. Dangl, Intracellular innate immune surveillance devices in  
533 plants and animals. *Science* 354, (2016).
- 534 2. R. E. Vance, R. R. Isberg, D. A. Portnoy, Patterns of pathogenesis: discrimination of  
535 pathogenic and nonpathogenic microbes by the innate immune system. *Cell Host*  
536 *Microbe* 6, 10-21 (2009).
- 537 3. P. S. Mitchell, A. Sandstrom, R. E. Vance, The NLRP1 inflammasome: new mechanistic  
538 insights and unresolved mysteries. *Curr Opin Immunol* 60, 37-45 (2019).
- 539 4. H. Cui, K. Tsuda, J. E. Parker, Effector-triggered immunity: from pathogen perception to  
540 robust defense. *Annu Rev Plant Biol* 66, 487-511 (2015).
- 541 5. N. L. Fischer, N. Naseer, S. Shin, I. E. Brodsky, Publisher Correction: Effector-triggered  
542 immunity and pathogen sensing in metazoans. *Nat Microbiol* 5, 528 (2020).
- 543 6. P. Broz, V. M. Dixit, Inflammasomes: mechanism of assembly, regulation and signalling.  
544 *Nat Rev Immunol* 16, 407-420 (2016).
- 545 7. C. L. Evavold, J. C. Kagan, Inflammasomes: Threat-Assessment Organelles of the Innate  
546 Immune System. *Immunity* 51, 609-624 (2019).
- 547 8. V. A. Rathinam, K. A. Fitzgerald, Inflammasome Complexes: Emerging Mechanisms  
548 and Effector Functions. *Cell* 165, 792-800 (2016).

- 549 9. R. Planes et al., Human NLRP1 is a sensor of pathogenic coronavirus 3CL proteases in  
550 lung epithelial cells. *Mol Cell* 82, 2385-2400 e2389 (2022).
- 551 10. K. S. Robinson et al., Enteroviral 3C protease activates the human NLRP1 inflammasome  
552 in airway epithelia. *Science* 370, (2020).
- 553 11. B. V. Tsu et al., Diverse viral proteases activate the NLRP1 inflammasome. *Elife* 10,  
554 (2021).
- 555 12. Q. Wang et al., CARD8 is an inflammasome sensor for HIV-1 protease activity. *Science*  
556 371, (2021).
- 557 13. A. J. Chui et al., N-terminal degradation activates the NLRP1B inflammasome. *Science*  
558 364, 82-85 (2019).
- 559 14. A. Sandstrom et al., Functional degradation: A mechanism of NLRP1 inflammasome  
560 activation by diverse pathogen enzymes. *Science* 364, (2019).
- 561 15. B. V. Tsu et al., Running With Scissors: Evolutionary Conflicts Between Viral Proteases  
562 and the Host Immune System. *Front Immunol* 12, 769543 (2021).
- 563 16. S. Chen et al., Feline Infectious Peritonitis Virus Nsp5 Inhibits Type I Interferon  
564 Production by Cleaving NEMO at Multiple Sites. *Viruses* 12, (2019).
- 565 17. M. Moustaqil et al., SARS-CoV-2 proteases PLpro and 3CLpro cleave IRF3 and critical  
566 modulators of inflammatory pathways (NLRP12 and TAB1): implications for disease  
567 presentation across species. *Emerg Microbes Infect* 10, 178-195 (2021).
- 568 18. X. Zhu et al., Porcine deltacoronavirus nsp5 inhibits interferon-beta production through  
569 the cleavage of NEMO. *Virology* 502, 33-38 (2017).
- 570 19. X. Zhu et al., Porcine Deltacoronavirus nsp5 Antagonizes Type I Interferon Signaling by  
571 Cleaving STAT2. *J Virol* 91, (2017).



- 572 20. C. P. Chuck et al., Profiling of substrate specificity of SARS-CoV 3CL. PLoS One 5,  
573 e13197 (2010).
- 574 21. C. P. Chuck, H. F. Chow, D. C. Wan, K. B. Wong, Profiling of substrate specificities of  
575 3C-like proteases from group 1, 2a, 2b, and 3 coronaviruses. PLoS One 6, e27228 (2011).
- 576 22. S. Fang, H. Shen, J. Wang, F. P. Tay, D. X. Liu, Functional and genetic studies of the  
577 substrate specificity of coronavirus infectious bronchitis virus 3C-like proteinase. J Virol  
578 84, 7325-7336 (2010).
- 579 23. D. H. Goetz et al., Substrate specificity profiling and identification of a new class of  
580 inhibitor for the major protease of the SARS coronavirus. Biochemistry 46, 8744-8752  
581 (2007).
- 582 24. J. Chavarria-Smith, P. S. Mitchell, A. M. Ho, M. D. Daugherty, R. E. Vance, Functional  
583 and Evolutionary Analyses Identify Proteolysis as a General Mechanism for NLRP1  
584 Inflammasome Activation. PLoS Pathog 12, e1006052 (2016).
- 585 25. A. D'Oswaldo et al., CARD8 and NLRP1 undergo autoproteolytic processing through a  
586 ZU5-like domain. PLoS One 6, e27396 (2011).
- 587 26. D. C. Johnson et al., DPP8/9 inhibitors activate the CARD8 inflammasome in resting  
588 lymphocytes. Cell Death Dis 11, 628 (2020).
- 589 27. M. K. Roe, N. A. Junod, A. R. Young, D. C. Beachboard, C. C. Stobart, Targeting novel  
590 structural and functional features of coronavirus protease nsp5 (3CL(pro), M(pro)) in the  
591 age of COVID-19. J Gen Virol 102, (2021).
- 592 28. A. Linder et al., CARD8 inflammasome activation triggers pyroptosis in human T cells.  
593 EMBO J 39, e105071 (2020).

- 594 29. T. S. Rodrigues et al., Inflammasomes are activated in response to SARS-CoV-2  
595 infection and are associated with COVID-19 severity in patients. *J Exp Med* 218, (2021).
- 596 30. E. Sefik et al., Inflammasome activation in infected macrophages drives COVID-19  
597 pathology. *Nature* 606, 585-593 (2022).
- 598 31. C. Junqueira et al., FcγR-mediated SARS-CoV-2 infection of monocytes activates  
599 inflammation. *Nature* 606, 576-584 (2022).
- 600 32. M. D. Daugherty, H. S. Malik, Rules of engagement: molecular insights from host-virus  
601 arms races. *Annu Rev Genet* 46, 677-700 (2012).
- 602 33. M. Sironi, R. Cagliani, D. Forni, M. Clerici, Evolutionary insights into host-pathogen  
603 interactions from mammalian sequence data. *Nat Rev Genet* 16, 224-236 (2015).
- 604 34. S. Rothenburg, G. Brennan, Species-Specific Host-Virus Interactions: Implications for  
605 Viral Host Range and Virulence. *Trends Microbiol* 28, 46-56 (2020).
- 606 35. M. Letko, S. N. Seifert, K. J. Olival, R. K. Plowright, V. J. Munster, Bat-borne virus  
607 diversity, spillover and emergence. *Nat Rev Microbiol* 18, 461-471 (2020).
- 608 36. V. D. Menachery et al., A SARS-like cluster of circulating bat coronaviruses shows  
609 potential for human emergence. *Nat Med* 21, 1508-1513 (2015).
- 610 37. R. R. da Fonseca, C. Kosiol, T. Vinar, A. Siepel, R. Nielsen, Positive selection on  
611 apoptosis related genes. *FEBS Lett* 584, 469-476 (2010).
- 612 38. K. J. Karczewski et al., The mutational constraint spectrum quantified from variation in  
613 141,456 humans. *Nature* 581, 434-443 (2020).
- 614 39. L. Bouchier-Hayes et al., CARDINAL, a novel caspase recruitment domain protein, is an  
615 inhibitor of multiple NF-κB activation pathways. *J Biol Chem* 276, 44069-44077  
616 (2001).

- 617 40. M. Yamamoto et al., A novel isoform of TUCAN is overexpressed in human cancer  
618 tissues and suppresses both caspase-8- and caspase-9-mediated apoptosis. *Cancer Res* 65,  
619 8706-8714 (2005).
- 620 41. D. C. Johnson et al., DPP8/DPP9 inhibitor-induced pyroptosis for treatment of acute  
621 myeloid leukemia. *Nat Med* 24, 1151-1156 (2018).
- 622 42. R. D. Bagnall et al., Novel isoforms of the CARD8 (TUCAN) gene evade a nonsense  
623 mutation. *Eur J Hum Genet* 16, 619-625 (2008).
- 624 43. K. P. Y. Hui et al., Tropism, replication competence, and innate immune responses of the  
625 coronavirus SARS-CoV-2 in human respiratory tract and conjunctiva: an analysis in ex-  
626 vivo and in-vitro cultures. *Lancet Respir Med* 8, 687-695 (2020).
- 627 44. S. M. Vora, J. Lieberman, H. Wu, Inflammasome activation at the crux of severe  
628 COVID-19. *Nat Rev Immunol* 21, 694-703 (2021).
- 629 45. J. K. Y. Yap, M. Moriyama, A. Iwasaki, Inflammasomes and Pyroptosis as Therapeutic  
630 Targets for COVID-19. *J Immunol* 205, 307-312 (2020).
- 631 46. D. P. Ball et al., Caspase-1 interdomain linker cleavage is required for pyroptosis. *Life*  
632 *Sci Alliance* 3, (2020).
- 633 47. B. E. Pickett et al., Virus pathogen database and analysis resource (ViPR): a  
634 comprehensive bioinformatics database and analysis resource for the coronavirus  
635 research community. *Viruses* 4, 3209-3226 (2012).
- 636 48. K. Katoh, D. M. Standley, MAFFT multiple sequence alignment software version 7:  
637 improvements in performance and usability. *Mol Biol Evol* 30, 772-780 (2013).
- 638 49. M. Kearse et al., Geneious Basic: an integrated and extendable desktop software platform  
639 for the organization and analysis of sequence data. *Bioinformatics* 28, 1647-1649 (2012).

- 640 50. C. Camacho et al., BLAST+: architecture and applications. *BMC Bioinformatics* 10, 421  
641 (2009).
- 642 51. Z. Yang, PAML 4: phylogenetic analysis by maximum likelihood. *Mol Biol Evol* 24,  
643 1586-1591 (2007).
- 644 52. B. Murrell et al., Gene-wide identification of episodic selection. *Mol Biol Evol* 32, 1365-  
645 1371 (2015).
- 646 53. S. Weaver et al., Datamonkey 2.0: A Modern Web Application for Characterizing  
647 Selective and Other Evolutionary Processes. *Mol Biol Evol* 35, 773-777 (2018).
- 648 54. S. L. Kosakovsky Pond, S. D. Frost, Not so different after all: a comparison of methods  
649 for detecting amino acid sites under selection. *Mol Biol Evol* 22, 1208-1222 (2005).
- 650 55. B. Murrell et al., FUBAR: a fast, unconstrained bayesian approximation for inferring  
651 selection. *Mol Biol Evol* 30, 1196-1205 (2013).
- 652 56. N. E. Sanjana, O. Shalem, F. Zhang, Improved vectors and genome-wide libraries for  
653 CRISPR screening. *Nat Methods* 11, 783-784 (2014).
- 654 57. T. Schmidt, J. L. Schmid-Burgk, V. Hornung, Synthesis of an arrayed sgRNA library  
655 targeting the human genome. *Sci Rep* 5, 14987 (2015).
- 656 58. M. M. Gaidt et al., Self-guarding of MORC3 enables virulence factor-triggered  
657 immunity. *Nature* 600, 138-142 (2021).
- 658 59. K. Labun et al., CHOPCHOP v3: expanding the CRISPR web toolbox beyond genome  
659 editing. *Nucleic Acids Res* 47, W171-W174 (2019).
- 660 60. J. L. Schmid-Burgk et al., OutKnocker: a web tool for rapid and simple genotyping of  
661 designer nuclease edited cell lines. *Genome Res* 24, 1719-1723 (2014).

662 61. T. Schmidt, J. L. Schmid-Burgk, T. S. Ebert, M. M. Gaidt, V. Hornung, Designer  
663 Nuclease-Mediated Generation of Knockout THP1 Cells. *Methods Mol Biol* 1338, 261-  
664 272 (2016).

665 62. M. Hoffmann et al., SARS-CoV-2 Cell Entry Depends on ACE2 and TMPRSS2 and Is  
666 Blocked by a Clinically Proven Protease Inhibitor. *Cell* 181, 271-280 e278 (2020).

667

### 668 **Competing interests**

669 Authors declare that they have no competing interests.

670

### 671 **Funding:**

672 National Institutes of Health grant R35 GM133633 (MDD)  
673 Pew Biomedical Scholars Program (MDD)  
674 Hellman Fellows Program (MDD)  
675 Burroughs Wellcome Investigators in the Pathogenesis of Infectious Disease Program (MDD)  
676 National Institutes of Health T32 grant GM007240 (BVT, APR, CB, LKC)  
677 National Science Foundation graduate research fellowship 2019284620 (CB)  
678 National Institutes of Health grant DP2 AI 154432-01 (PSM)  
679 Mallinckrodt Foundation grant (PSM)  
680 National Institutes of Health T32 grant GM007270 (JK)  
681 UC Berkeley CEND Catalyst award (REV)  
682 National Institutes of Health grant R37AI075039 (REV)  
683 Helen Hay Whitney Postdoctoral Fellowship (NSG)  
684 Investigator of the Howard Hughes Medical Institute (REV)  
685

### 686 **Author contributions:**

687 Conceptualization: BVT, PSM, MDD  
688 Methodology: BVT, NSG, JK, APR, EAT, PSM, MDD  
689 Investigation: BVT, RA, NSG, JK, APR, LKC, CMB, EAT, EJF, PSM, MDD  
690 Visualization: BVT, NSG, PSM, MDD  
691 Funding acquisition: REV, PSM, MDD  
692 Project administration: REV, JLH, RS, PSM, MDD  
693 Supervision: REV, JLH, RS, PSM, MDD  
694 Writing – original draft: BVT, PSM, MDD  
695 Writing – review & editing: All authors

696 **Supporting Information**

**A**

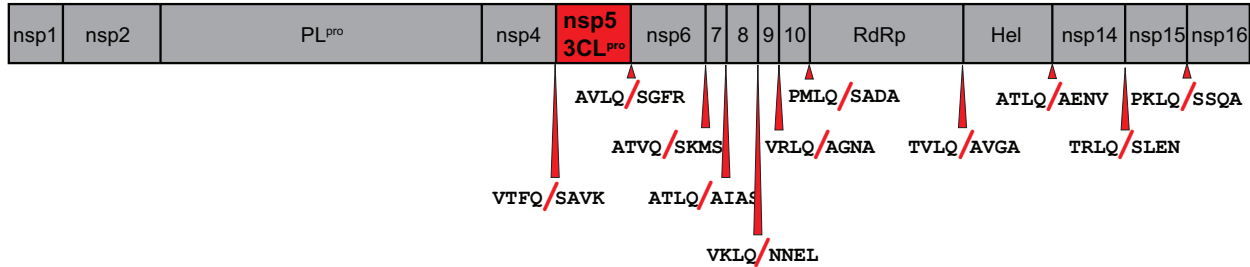

**B**

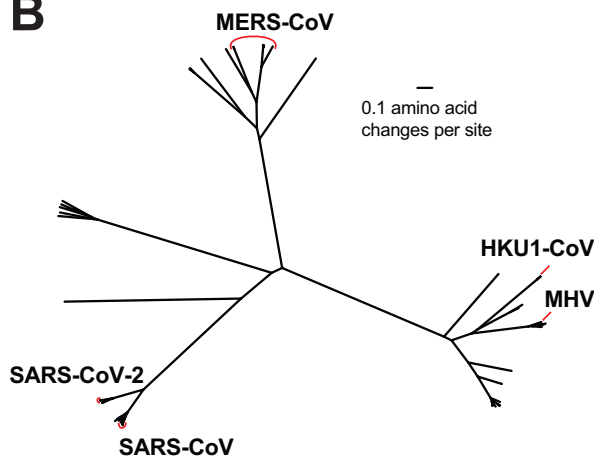

**C**

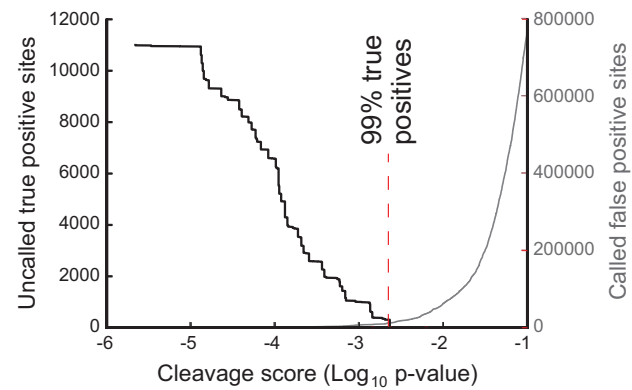

697

698

**S1 Fig. Motif generation of coronaviral 3CL<sup>pro</sup> polyprotein cleavage.**

699

700

701

702

703

704

705

706

707

708

709

710

711

(A) Schematic of 3CL<sup>pro</sup> cleavage sites (11 red triangles) within the polyprotein of SARS-CoV-2 (SARS-2), the causative agent of COVID-19. Shown are four amino acids flanking each side of the cleavage site within the polyprotein. (B) Phylogenetic tree of 60 coronavirus polyprotein coding sequences depicting the betacoronaviruses sampled in this study with human relevant coronaviruses labeled (table S2). (C) Training set data used to determine the motif search threshold for FIMO (table S1). The X-axis represents a log<sub>10</sub> of the p-value reported by FIMO as an indicator for the strength of the cleavage motif hit (cleavage score). (Left) The Y-axis depicts the number of uncalled true positives, or motif hits that overlap with the initial set of 8mer polyprotein cleavage sites used to generate the motif, in the training set of coronavirus polyprotein sequences (black line). (Right) The Y-axis depicts the number of called false positive sites, or any motif hits found in the polyprotein that are not known to be cleaved by 3CL<sup>pro</sup>, in the training set of coronaviral polyprotein sequences (gray). A red vertical dashed line indicates the threshold that captures 99% of true positive polyprotein hits (p-value = 0.00231).

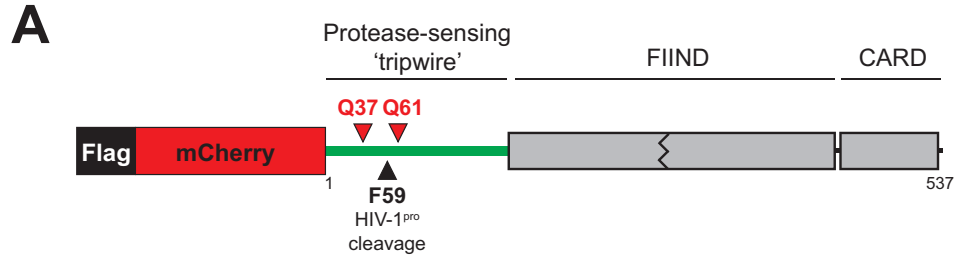

**Predicted protein products**

- Full length CARD8 (92 kDa)
- FIIND processed CARD8 (63 kDa)
- 3CL<sup>pro</sup> cleaved CARD8 at site Q37 (34 kDa)
- HIV-1<sup>pro</sup> cleaved CARD8 at site F59 (37 kDa)
- 3CL<sup>pro</sup> cleaved CARD8 at site Q61 (37 kDa)

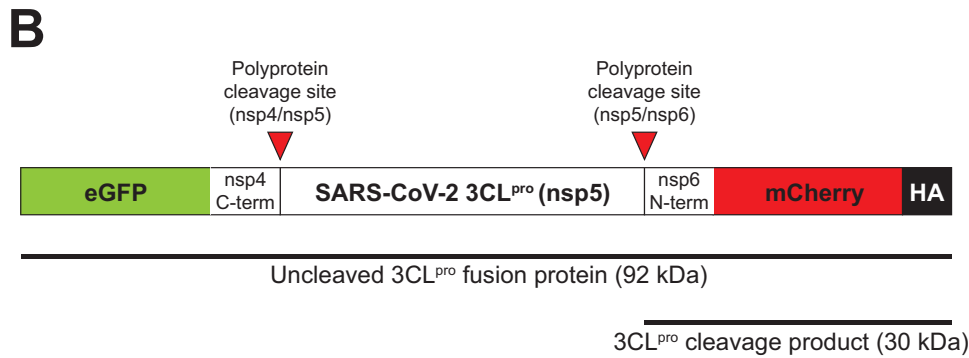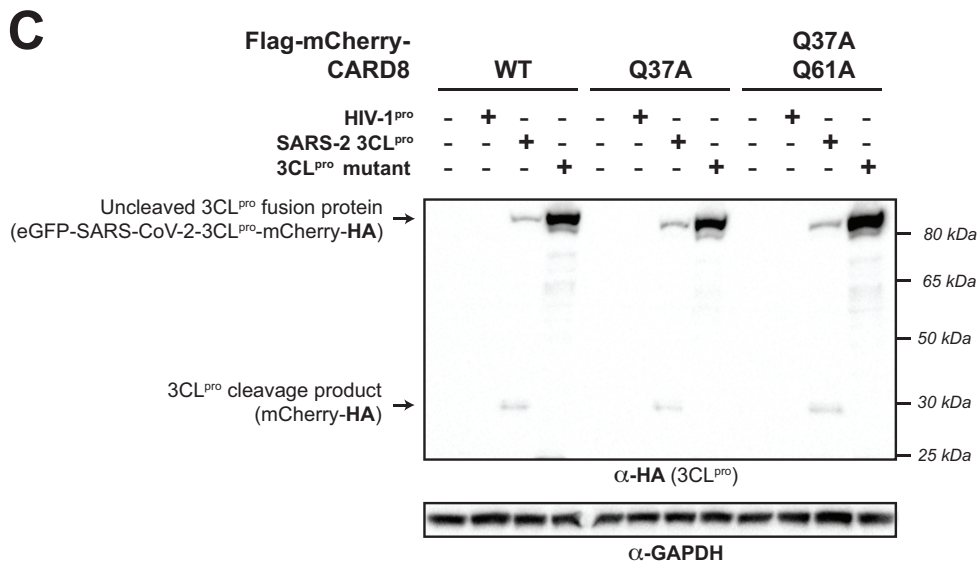

713 **S2 Fig. Schematic of CARD8 and 3CL<sup>pro</sup> expression constructs for cleavage assays and**  
714 **immunoblot depicting HA-tagged SARS-2 3CL<sup>pro</sup> and SARS-2 3CL<sup>pro</sup> mutant.**

715 (A) Schematic of the expression constructs used for CARD8 cleavage assays. Full length  
716 CARD8 was fused to a 3xFlag-mCherry domain to increase the stability and our ability to detect  
717 viral protease cleavage products in the N-terminus of CARD8. Below are shown the expected  
718 sizes of full length and FIIND processed CARD8, as well as the expected sizes that would result  
719 from viral protease cleavage at the indicated sites. (B) Schematic of the expression constructs  
720 used for 3CL<sup>pro</sup>s (nsp5s). A region of the viral polyprotein spanning the C-terminal nine residues  
721 of nsp4 through the N-terminal nine residues of nsp6 was cloned between eGFP and mCherry-  
722 HA. Inactive protease is expressed as a full-length fusion protein (92 kDa predicted molecular  
723 weight). Active 3CL<sup>pro</sup> cleaves at the indicated polyprotein cleavage sites (red triangles),  
724 liberating the active protease from the construct and resulting in an HA-tagged mCherry product  
725 (30 kDa predicted molecular weight). (C) An expanded view of the anti-HA-stained immunoblot  
726 shown in Figure 1B highlighting uncleaved (Uncleaved 3CL<sup>pro</sup> fusion protein) and cleaved  
727 (3CL<sup>pro</sup> cleavage product) HA-tagged protein products.



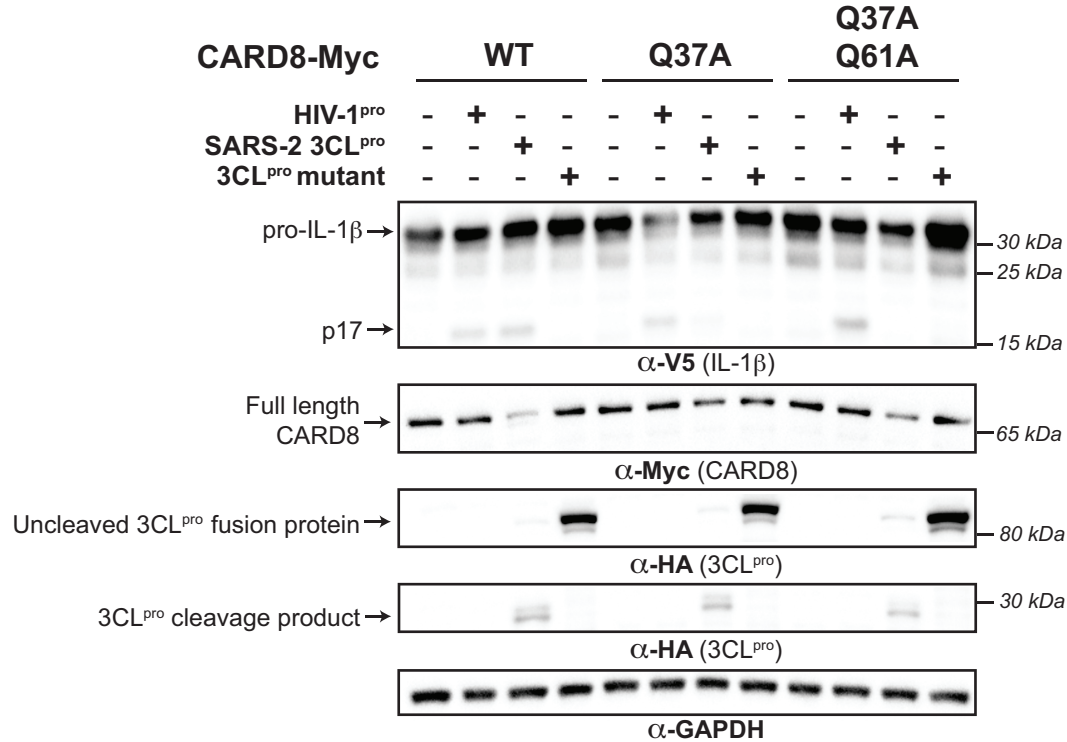

728

729 **S3 Fig. CARD8 cleavage by viral proteases results in inflammasome activation and IL-1 $\beta$**   
 730 **maturation.**

731 CARD8 inflammasome assay. CARD8 KO HEK293T cells were co-transfected using the  
 732 indicated Myc-tagged CARD8 plasmid constructs, V5-IL-1 $\beta$ , CASP1, and HA-tagged protease  
 733 constructs (SARS-CoV-2 3CL<sup>pro</sup> (SARS-2 3CL<sup>pro</sup>), SARS-CoV-2 3CL<sup>pro</sup> catalytic mutant  
 734 C145A (3CL<sup>pro</sup> mutant), HIV-1 gag-pol (HIV-1<sup>pro</sup>), or empty vector (-)). Appearance of a mature  
 735 bioactive IL-1 $\beta$  (p17) indicates inflammasome activation.

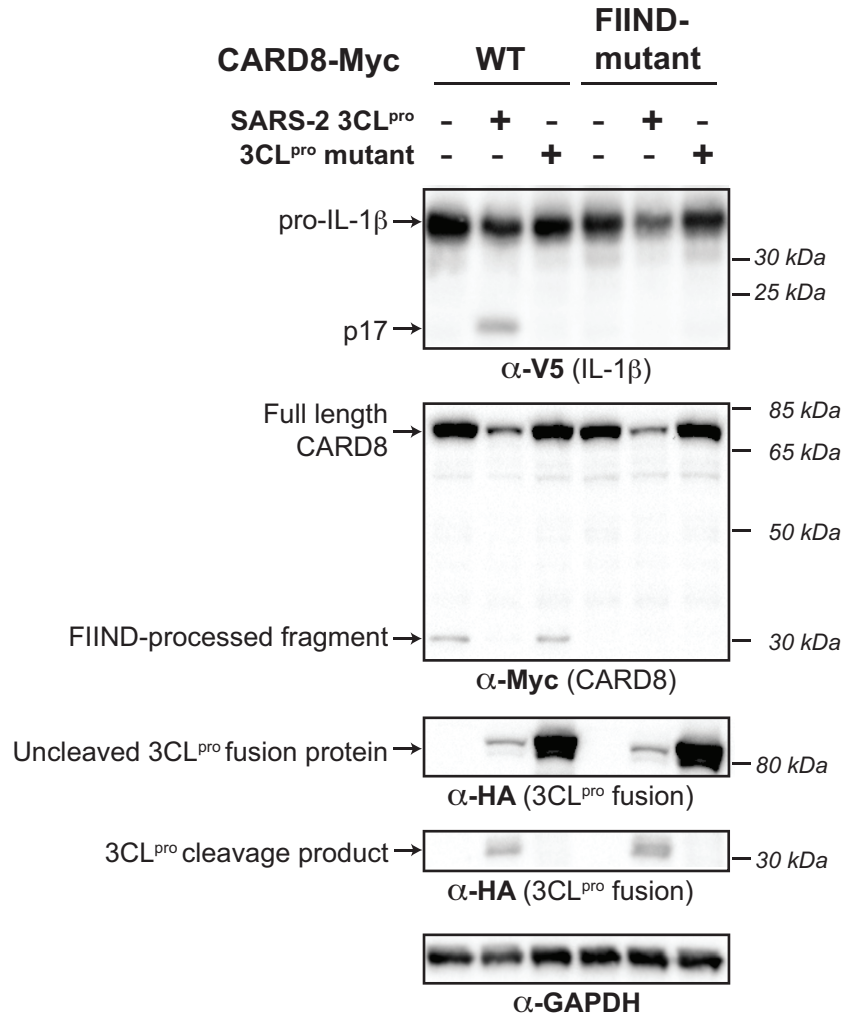

736

737 **S4 Fig. 3CL<sup>pro</sup>-mediated activation of the human CARD8 inflammasome depends on**  
738 **FIIND autoprocessing.**

739 CARD8 inflammasome activation assay depicting loss of CARD8 activation with a FIIND  
740 autoprocessing mutant (S297A).

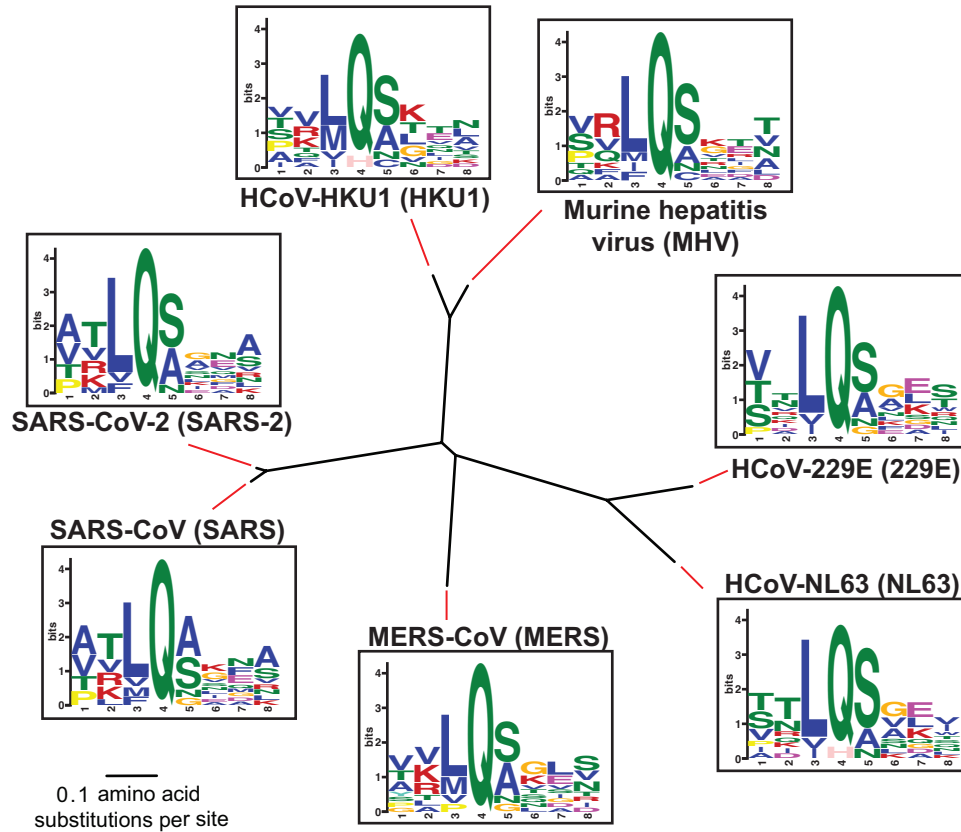

741

742 **S5 Fig. 3CL<sup>pro</sup>s used in this study demonstrate similar polyprotein cleavage.**

743 Phylogenetic tree of 3CL<sup>pro</sup> protein sequences used in this study from the indicated  
744 coronaviruses. Shown next to the virus name is the sequence motif generated from the 3CL<sup>pro</sup>  
745 polyprotein cleavage sites from that specific virus.

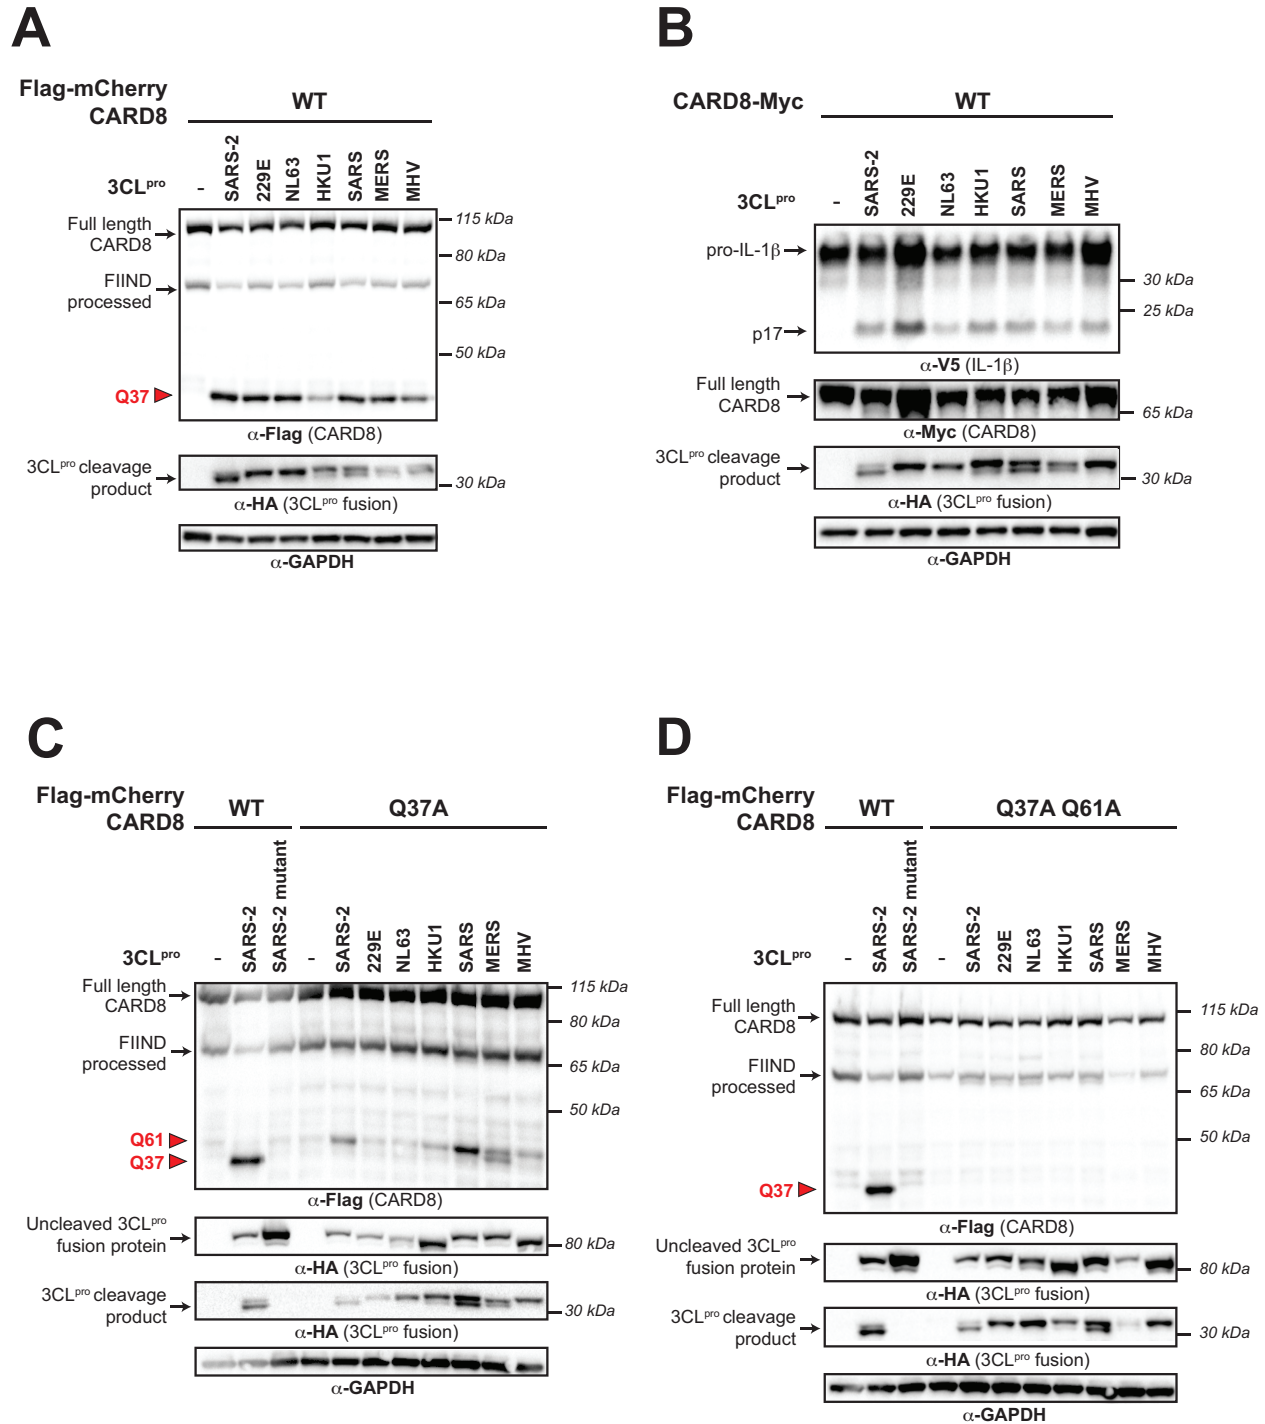

746

747 **S6 Fig. Site-specific CARD8 cleavage and inflammasome activation by diverse coronavirus**  
748 **3CL<sup>pro</sup>s.**

749 (A) Cleavage assay depicting cleavage of human CARD8 by the indicated 3CL<sup>pro</sup>s from diverse  
750 coronaviruses (SARS-CoV-2 (SARS-2), HCoV-229E (229E), HCoV-NL63 (NL63), HCoV-  
751 HKU1 (HKU1), SARS-CoV (SARS), MERS-CoV (MERS), and murine hepatitis virus (MHV)).  
752 (B) CARD8 inflammasome activation assay with human CARD8 WT and the indicated 3CL<sup>pro</sup>.

753 (C-D) Cleavage assays mapping the cleavage specificity of diverse 3CL<sup>pro</sup>s. Indicated proteases  
754 were co-transfected with WT and Q37A (C) or Q37A Q61A (D).

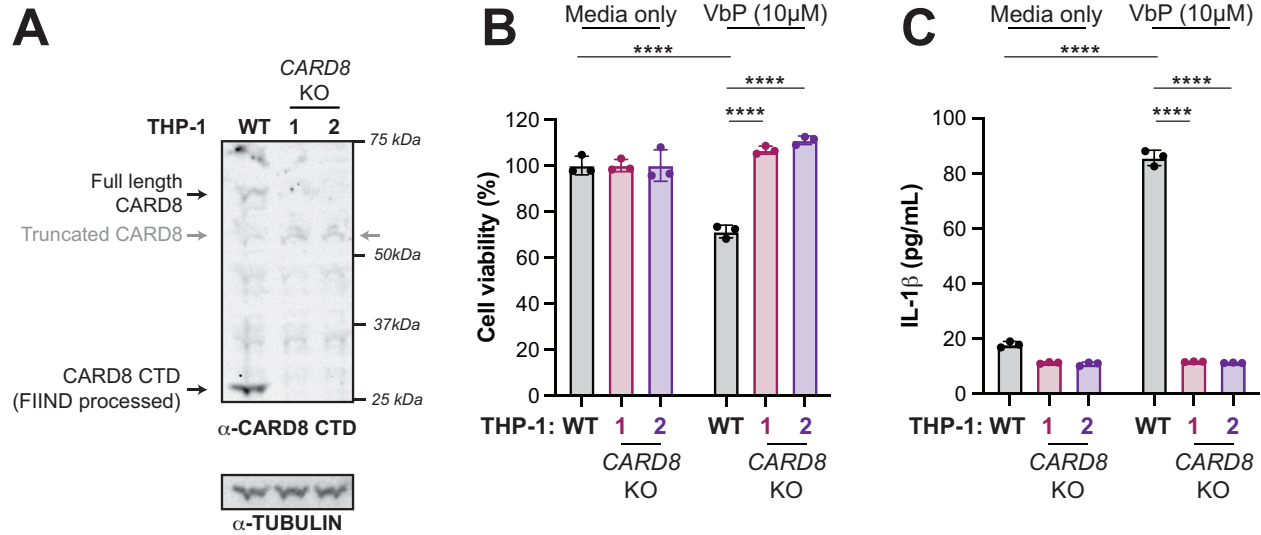

755

756 **S7 Fig. Validation of *CARD8* KO THP-1 cells.**

757 (A) Immunoblot of wildtype (WT) or *CARD8* knockout (KO) 1 and KO2 THP-1 cells. The  
758 sgRNA used to edit *CARD8* results in a truncated *CARD8* (grey arrow) that removes the C-  
759 terminal domain (CTD), including the CARD. (B-C) Indicated THP-1 cells were primed with 0.5  
760 μg/mL Pam3CSK4 for 6h, followed by treatment with 10 μM Val-boroPro (VbP) or media only.  
761 Cell viability (B) was measured 48h post-treatment via the Cell Titer Glo assay and IL-1β levels  
762 (C) were measured from cell supernatants using the IL1R reporter assay as in **Fig 1D** (see  
763 **Methods**). Data presented are representative of experiments performed in triplicate. Data were  
764 analyzed using two-way ANOVA with Šidák's post-test:  $p < 0.0001$ .

|                                                  |                                                                                   |
|--------------------------------------------------|-----------------------------------------------------------------------------------|
|                                                  | <b>Q349</b>                                                                       |
| Rousettus aegyptiacus (XP_016010887.2)           | ▼<br>VRLQSSPP                                                                     |
| Mammalian consensus sequence                     |  |
| Dasyopus novemcinctus (XP_004455135.1)           | VRLQTSPP                                                                          |
| Choloepus didactylus (XP_037676345.1)            | VRLQTSPP                                                                          |
| Orycteropus afer afer (XP_007941216.2)           | VRLQTSPP                                                                          |
| Echinops telfairi (XP_045148583.1)               | VRLQTSPP                                                                          |
| Elephas maximus indicus (XP_049756664.1)         | VRLQTSPP                                                                          |
| Trichechus manatus latirostris (XP_023591965.1)  | VRLQTSPP                                                                          |
| Loxodonta africana (XP_023398968.1)              | VRLQTSPP                                                                          |
| Tupaia chinensis (XP_006142263.2)                | VRLQTSPP                                                                          |
| Otolemur garnettii (XP_023363700.1)              | VRLQTSPP                                                                          |
| Carlito syrichta (XP_008065260.1)                | VRLQTSPP                                                                          |
| Callithrix jacchus (XP_008986567.2)              | VRLQTSPP                                                                          |
| Aotus nancymae (XP_021524182.1)                  | VRLQTSPP                                                                          |
| Saimiri boliviensis boliviensis (XP_003940505.2) | VRLQTSPP                                                                          |
| Cebus imitator (XP_017355929.1)                  | VRLQTSPP                                                                          |
| Sapajus apella (XP_032126901.1)                  | VRLQTSPP                                                                          |
| Pongo abelii (NP_001125643.1)                    | VRLQTSPP                                                                          |
| Nomascus leucogenys (XP_030676824.1)             | VRLQTSPP                                                                          |
| Hylobates moloch (XP_032025189.1)                | VRLQTSPP                                                                          |
| Homo sapiens (NP_001171829.1)                    | VRLQTSPP                                                                          |
| Gorilla gorilla gorilla (XP_030860007.1)         | VRLQTSPP                                                                          |
| Pan paniscus (XP_034801359.1)                    | VRLQTSPP                                                                          |
| Pan troglodytes (XP_009434234.2)                 | VRLQTSPP                                                                          |
| Rhinopithecus bieti (XP_017744314.1)             | VRLQTSPP                                                                          |
| Rhinopithecus roxellana (XP_030798493.1)         | VRLQTSPP                                                                          |
| Macaca mulatta (XP_028694412.1)                  | VRLQTSPP                                                                          |
| Cercocebus atys (XP_011936103.1)                 | VRLQTSPP                                                                          |
| Papio anubis (XP_031516220.1)                    | VRLQTSXP                                                                          |
| Theropithecus gelada (XP_025223748.1)            | VRLQTSPP                                                                          |
| Papio anubis (XP_031514956.1)                    | VRLQTSPP                                                                          |
| Macaca fascicularis (XP_045236836.1)             | VRLQTSPP                                                                          |
| Macaca nemestrina (XP_011734426.1)               | VRLQTSPP                                                                          |
| Chlorocebus sabaeus (XP_037847268.1)             | VRLQTSPP                                                                          |
| Mandrillus leucophaeus (XP_011831805.1)          | VRLQTSPP                                                                          |
| Colobus angolensis palliatus (XP_011801863.1)    | VRLQTSPP                                                                          |
| Trachypithecus francoisi (XP_033079741.1)        | VRLQTSPP                                                                          |
| Ceratottherium simum simum (XP_014650570.1)      | VRLQTSPP                                                                          |
| Rousettus aegyptiacus (XP_016010887.2)           | VRLQTSPP                                                                          |
| Pteropus alecto (XP_006905198.1)                 | VRLQSSPP                                                                          |
| Pteropus vampyrus (XP_011376482.1)               | VRLQSSPP                                                                          |
| Pteropus giganteus (XP_039724536.1)              | VRLQSSPP                                                                          |
| Hyaena hyaena (XP_039104475.1)                   | VRLQTSPP                                                                          |
| Puma concolor (XP_025770087.1)                   | VRLQTSPP                                                                          |
| Leopardus geoffroyi (XP_045296688.1)             | VRLQTSPP                                                                          |
| Felis catus (XP_006941207.3)                     | VRLQTSPP                                                                          |
| Prionailurus bengalensis (XP_043456356.1)        | VRLQTSPP                                                                          |
| Prionailurus viverrinus (XP_047693116.1)         | VRLQTSPP                                                                          |
| Lynx canadensis (XP_030155679.1)                 | VRLQTSPP                                                                          |
| Lynx rufus (XP_046933669.1)                      | VRLQTSPP                                                                          |
| Puma yagouaroundi (XP_040313498.1)               | VRLQTSPP                                                                          |
| Acinonyx jubatus (XP_014938520.1)                | VRLQTSPP                                                                          |
| Panthera tigris (XP_007074174.1)                 | VRLQTSPP                                                                          |
| Panthera uncia (XP_049478262.1)                  | VRLQTSPP                                                                          |
| Panthera leo (XP_042775368.1)                    | VRLQTSPP                                                                          |
| Panthera pardus (XP_019281377.1)                 | VRLQTSPP                                                                          |
| Vulpes vulpes (XP_025869883.1)                   | VRLQTSPP                                                                          |
| Canis lupus familiaris (XP_038316790.1)          | VRLQTSPP                                                                          |
| Canis lupus dingo (XP_025280236.1)               | VRLQTSPP                                                                          |
| Odobenus rosmarus divergens (XP_004401075.2)     | VRLQTSPP                                                                          |
| Callorhinus ursinus (XP_025705476.1)             | VRLQTSPP                                                                          |
| Zalophus californianus (XP_027475647.1)          | VRLQTSPP                                                                          |
| Eumetopias jubatus (XP_027943719.1)              | VRLQTSPP                                                                          |
| Halichoerus grypus (XP_035955734.1)              | VRLQTSPP                                                                          |
| Phoca vitulina (XP_032244836.1)                  | VRLQTSPP                                                                          |
| Leptonychotes weddellii (XP_030897212.1)         | VRLQTSPP                                                                          |
| Neomonachus schauinslandi (XP_021536893.1)       | VRLQTSPP                                                                          |
| Mirounga angustirostris (XP_045746402.1)         | VRLQTSPP                                                                          |
| Mirounga leonina (XP_034842787.1)                | VRLQTSPP                                                                          |
| Ailuropoda melanoleuca (XP_002917973.3)          | VRLQTSPP                                                                          |
| Ursus arctos (XP_026337717.1)                    | VRLQTSPP                                                                          |
| Ursus maritimus (XP_008682721.1)                 | VRLQTSPP                                                                          |
| Ursus americanus (XP_045628234.1)                | VRLQTSPP                                                                          |
| Meles meles (XP_045843773.1)                     | VRLQTSPP                                                                          |
| Neogale vison (XP_044116462.1)                   | VRLQTSPP                                                                          |
| Mustela erminea (XP_032179857.1)                 | VRLQTSPP                                                                          |
| Mustela putorius fuRo (XP_004767506.1)           | VRLQTSPP                                                                          |
| Lontra canadensis (XP_032694832.1)               | VRLQTSPP                                                                          |
| Lutra lutra (XP_047567415.1)                     | VRLQTSPP                                                                          |
| Enhydra lutris kenyoni (XP_022379885.1)          | VRLQTSPP                                                                          |

Megabats

766 **S8 Fig. A coronavirus 3CL<sup>pro</sup> cleavage site in the CARD8 C-terminus is unique to**  
767 **megabats.**

768 An alignment of protein sequences homologous to the coronavirus 3CL<sup>pro</sup> cleavage site in  
769 megabat (*Rousettus aegyptiacus*) CARD8 is shown for indicated species (scientific name,  
770 accession number). Amino acid numbering is based on *R. aegyptiacus* CARD8. Changes relative  
771 to the consensus, depicted as a sequence logo at the top of the alignment) are highlighted. Four  
772 species of megabats are indicated, and are unique in having a serine in the P1' position of the  
773 cleavage site (highlighted in red). Most other species have a threonine in this position, which  
774 makes the protein uncleavable at this site (**Fig 3E**).



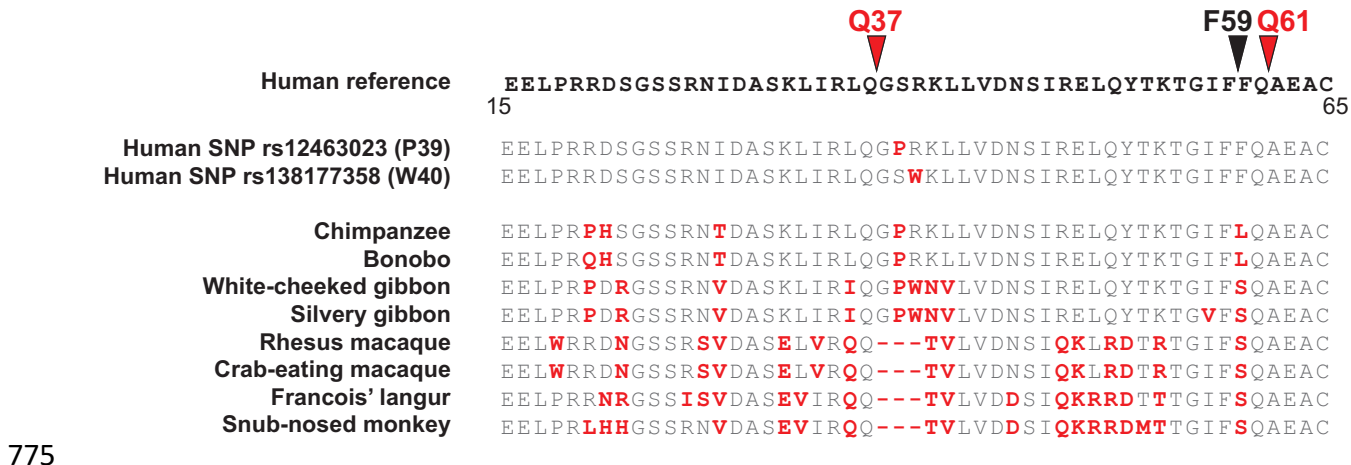

775

776 **S9 Fig. Rapid evolution and human polymorphism in the ‘tripwire’ region of CARD8 that**

777 **is targeted by viral proteases.**

778 An alignment of the CARD8 N-terminus (amino acids 15-65, where amino acid numbering is

779 based on human CARD8) or ‘tripwire’ region from humans and selected non-human primates.

780 Human non-synonymous single nucleotide polymorphism (SNP) that encode CARD8 P39 and

781 W40 are shown. Differences relative to the human reference protein sequence (accession

782 NP\_001338711) are indicated in red font. Coronavirus 3CL<sup>pro</sup> (Q37 and Q61; red arrows) and

783 HIV-1<sup>pro</sup> cleavages sites in CARD8 are shown. ‘-’ = indel.

**A**

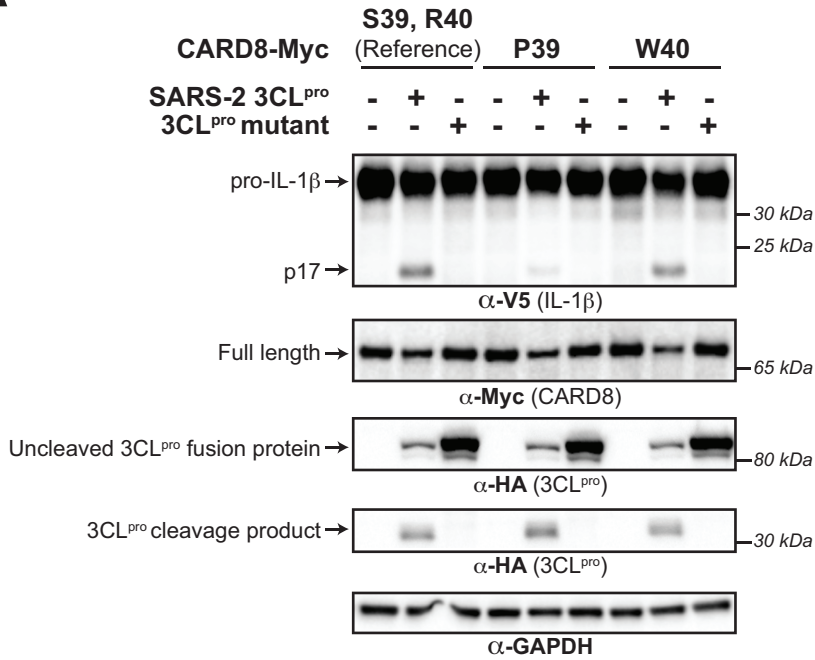

**B**

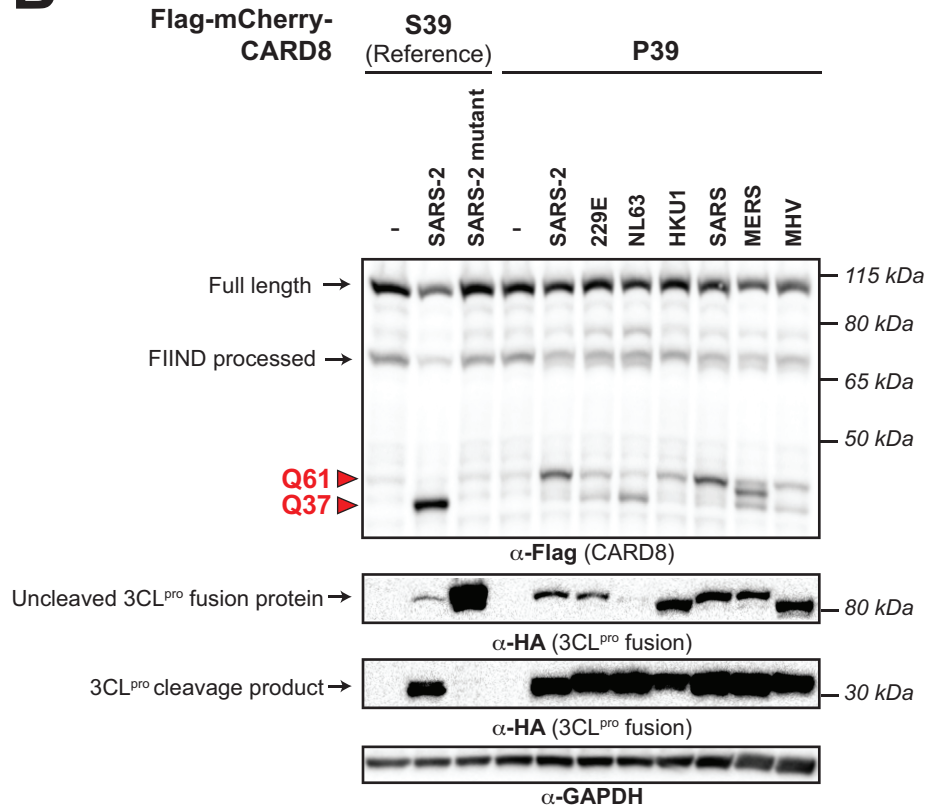

784

785 **S10 Fig. The human CARD8 S39P variant has reduced sensitivity to coronavirus 3CL<sup>pro</sup>**  
786 **cleavage and inflammasome activation.**

787 (A) CARD8 inflammasome activation assay, where inflammasome activation is measured by  
788 CASP1-dependent processing of pro-IL-1 $\beta$  to p17. *CARD8* knockout HEK293T cells were co-  
789 transfected with Myc-tagged constructs encoding the reference allele of human CARD8 (protein  
790 accession NP\_001338711, mRNA accession NM\_001351782.2) or the human CARD8 non-  
791 synonymous single nucleotide polymorphism (SNP) CARD8-P39 (rs12463023) or CARD8-W40  
792 (rs138177358) variants and the HA-tagged SARS-CoV-2 (SARS-2) 3CL<sup>pro</sup>. (B) Comparison of  
793 CARD8 S39 and CARD8 P39 cleavage by diverse coronavirus 3CL<sup>pro</sup>s. *CARD8* knockout  
794 HEK293T cells were co-transfected using the indicated Flag-tagged mCherry-CARD8 fusion  
795 constructs with HA-tagged protease constructs (empty vector ('-'), SARS-2 catalytically inactive  
796 mutant (3CL<sup>pro</sup> mutant) or active 3CL<sup>pro</sup> from SARS-2, 229E, NL63, HKU1, SARS, MERS, or  
797 MHV. Red triangles indicate cleavage sites 3CL<sup>pro</sup>.  
798

799

Consensus 3C<sup>pro</sup>  
cleavage site

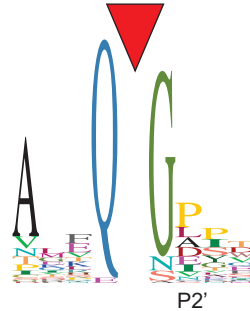

|     |                       |    |      |               | p-val |                |
|-----|-----------------------|----|------|---------------|-------|----------------|
|     |                       | 34 | IRLQ | GSRK          | 41    | not detected   |
| 800 | Human reference (S39) |    | IRLQ | GSRK          |       |                |
|     | SNP rs12463023 (P39)  |    | IRLQ | G <b>P</b> RK |       | <b>0.00108</b> |

800

801 **S11 Fig. A human SNP is predicted to result in a CARD8 protein that is cleavable by**  
802 **picornavirus 3C<sup>pro</sup>s.**

803 A previously generated 3C<sup>pro</sup> consensus cleavage motif for enteroviruses (a genus within  
804 picornaviruses), in which a proline is most common in the P2' position, is shown (11). Using this  
805 motif to search the human reference CARD8 protein sequence, which contains a serine at residue  
806 39 (S39), does not generate a predicted cleavage site at Q37. However, a human SNP  
807 (rs12463023) results in a proline at residue 39 (P39), which generates a predicted 3C<sup>pro</sup> cleavage  
808 site.

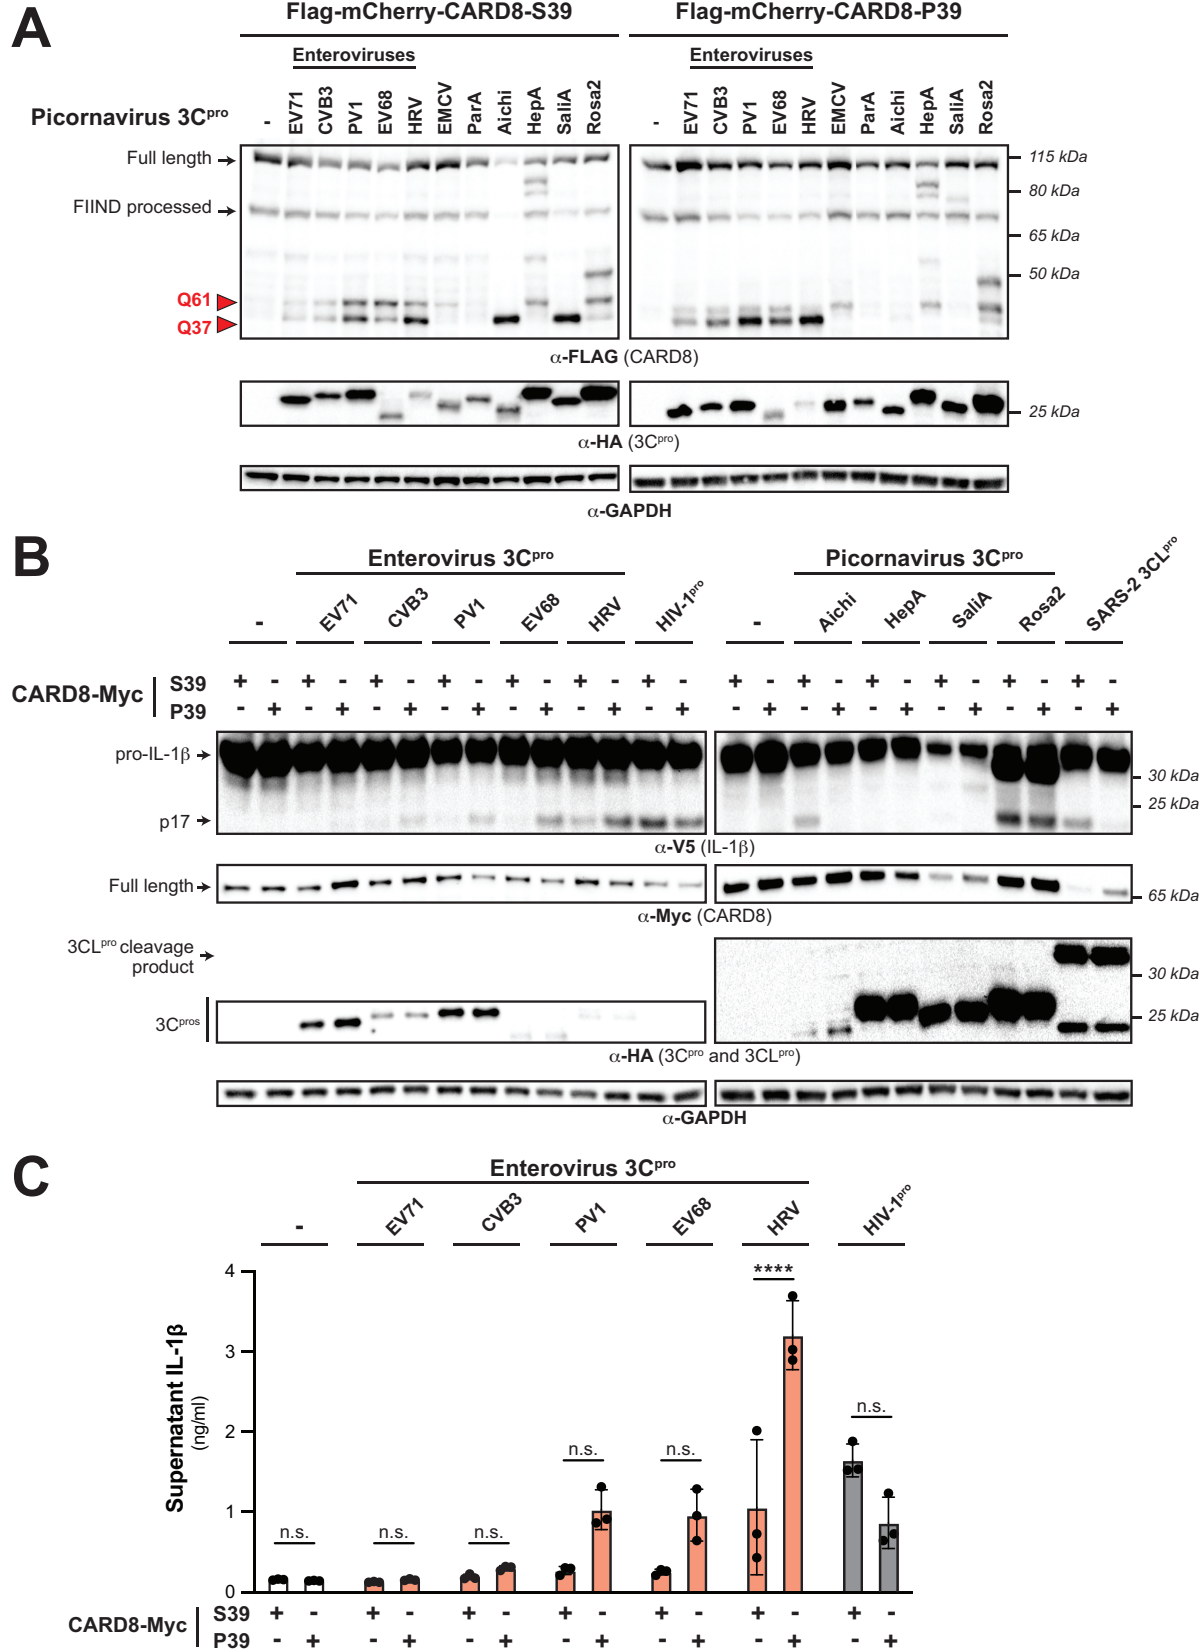

810 **S12 Fig. The CARD8 P39 variant is variably susceptible to picornavirus 3C<sup>pro</sup>s.**

811 (A) WT HEK293T cells were co-transfected using the indicated Flag-tagged mCherry-CARD8  
812 fusion plasmid constructs with V5-IL-1 $\beta$ , CASP1, and HA-tagged 3C<sup>pro</sup> constructs or empty  
813 vector ('-'). 3C<sup>pro</sup>s from the following viruses were used: enterovirus A71 (EV71),  
814 coxsackievirus B3 (CVB3), poliovirus 1 (PV1), enterovirus D68 (EV68), human rhinovirus A  
815 (HRV), encephalomyocarditis virus (EMCV), human parechovirus A (ParA), Aichi virus  
816 (Aichi), hepatitis A virus (HepA), human salivirus A (SaliA), and human rosavirus 2 (Rosa2).  
817 Red arrows denote CARD8 fragments resulting from 3C<sup>pro</sup> cleavage at indicated sites. (B)  
818 CARD8 inflammasome activation assay, where inflammasome activation is measured by  
819 CASP1-dependent processing of pro-IL-1 $\beta$  to p17. CARD8 knockout HEK293T cells were co-  
820 transfected with Myc-tagged constructs encoding the reference allele of human CARD8 (protein  
821 accession NP\_001338711, mRNA accession NM\_001351782.2) or the human CARD8 non-  
822 synonymous single nucleotide polymorphism (SNP) CARD8-P39 (rs12463023) and the  
823 indicated 3C<sup>pro</sup>, 3CL<sup>pro</sup>, or HIV-1<sup>pro</sup> constructs, or empty vector ('-'). (C) IL-1 $\beta$  assay, which  
824 measures the release of bioactive IL-1 $\beta$  in the culture supernatant of cells transfected as  
825 described in (B). Individual values (n=3), averages, and standard deviations shown are  
826 representative of experiments performed in triplicate. Data were analyzed using one-way  
827 ANOVA with Tukey's post-test. n.s. = not significant. \*\*\*\* = p<0.0001.  
828

- 829 **S1 Table. VIPR and RefSeq betacoronaviral polyproteins with 3CL cleavage site**  
830 **concatenations.**
- 831 **S2 Table. Betacoronaviral polyproteins with unique 8mer 3CL cleavage site**  
832 **concatenations.**
- 833 **S3 Table. Accession numbers of CARD8 sequences used for evolutionarily analyses.**
- 834 **S4 Table. Codon positions in full length CARD8 from hominoids and Old World monkeys**  
835 **predicted to be evolving under recurrent positive selection by PAML, FUBAR, and FEL**  
836 **analyses.**
- 837 **S5 Table. CARD8 missense variants (>100 allele counts) mapped to GRCh38 reported in**  
838 **gnomAD v3.1.2.**
- 839 **S6 Table. CARD8 missense variants (>100 allele counts) mapped to GRCh38 reported in**  
840 **gnomAD v3.1.2 represented by population with the highest allele frequency.**
- 841 **S7 Table. Primers, gBlocks, Twist fragments, and sgRNA.**
- 842 **S8 Table. List of antibody specifications.**
